# Supplementary material
Source: PubMed Central journal article supplement (PMC3285374)

## Supplementary Information

### General Information

All reactions were carried out under an atmosphere of argon in flame-dried or oven-dried glassware with magnetic stirring, unless otherwise noted. Air-sensitive reagents and solutions were introduced into the apparatus through rubber septa. When necessary, solvents and reagents were dried prior to use. Reagents were purified following the guidelines of Perrin and Armarego. Tetrahydrofuran (THF), dichloromethane (DCM) and diethyl ether (Et<sub>2</sub>O) were filtered through a column of activated alumina under an argon atmosphere. Pyridine, *N,N*-diisopropylethylamine and triethylamine were distilled from calcium hydride. 1, 8-Diazabicyclo[5.4.0]undec-7-ene (DBU) and piperidine were purchased from Aldrich and used without further purification. 2-(1H-7-Azabenzotriazol-1-yl)-1,1,3,3-tetramethyl uronium hexafluorophosphate (HATU) was purchased from GenScript and used without purification.

## Analytical Equipment

$^1\text{H}$  NMR spectra and  $^{13}\text{C}$  NMR spectra were recorded on a Bruker Advance DRX-600 MHz at ambient temperature. Chemical shifts are reported in parts per million relative to residual solvent  $\text{CD}_3\text{OD}$  ( $^1\text{H}$ , 3.31 ppm;  $^{13}\text{C}$ , 49.15 ppm). Multiplicities are reported as follows: s = singlet, d = doublet, t = triplet, m = multiplet, bs = broad singlet, dd = doublet of doublets, td = triplet of doublets. All  $^{13}\text{C}$  NMR spectra were recorded with complete proton decoupling. Low-resolution mass spectral analyses were performed with a JOEL JMS-DX-303-HF mass spectrometer or Waters Micromass ZQ mass spectrometer. Analytical TLC was performed on E. Merck silica gel 60 F254 plates and flash column chromatography was performed on E. Merck silica gel 60 (40–63 mm). Yields refer to chromatographically pure compounds.

Low resolution mass spectra (electrospray ionization) were acquired on a ZQ Micromass spectrometer. Samples were introduced by direct injection. LC-MS analysis were performed with a Waters Alliance analytical LC system in tandem with the ZQ Micromass measurement.

## HPLC

All separations involved a mobile phase of 0.05% TFA (v/v) in Water (solvent A) /0.04% TFA in acetonitrile (solvent B). HPLC LC-MS chromatographic separations were performed using a Waters 2695 Separations Module and a Waters 2996 Photodiode Array Detector equipped with Varian Microsorb C18 column (150 x 2 mm) or Waters C8 X-Bridge column (150 x 2.1 mm) or Varian 300-5 C4 column (250 x 2 mm) at a flow rate of 0.2 mL/min. UPLC LC-MS chromatographic separations were performed using a Waters Acquity system equipped with an Acquity UPLC BEH C18 column (100 x 2.1 mm). HPLC separations were performed using a Rainin HPXL solvent delivery system equipped with a Rainin UV-1 detector using either Microsorb 100-5 C18 column (250 x 21.4 mm) at a flow rate of 16 mL/min or Waters C8 X-Bridge column (150 x 19 mm) at a flow rate of 16 mL/min or Varian 300-5 C4 column (250 x 4.6 mm) at a flow rate of 1.4 mL/min.

## General procedure for Solid-phase peptide synthesis (SPPS) by Fmoc-strategy

Automated peptide synthesis was performed on an Applied Biosystems Pioneer continuous S3 flow peptide synthesizer. Peptides were synthesized under standard automated Fmoc protocols. The deblock mixture was a mixture of DMF/piperidine/DBU 98:2:2. The following Fmoc amino acids from NovaBiochem were employed: Fmoc-Ala-OH, Fmoc-Arg(Pbf)-OH, Fmoc-Asn(Trt)-OH, Fmoc-Asp(OtBu)-OH, Fmoc-Cys(Acm)-OH, Fmoc-Cys(*t*Buthio)-OH, Fmoc-Gln(Trt)-OH, Fmoc-Glu(OAll)-OH, Fmoc-Glu(OtBu)-OH, Fmoc-Gly-OH, Fmoc-His(Trt)-OH, Fmoc-Ile-OH, Fmoc-Leu-OH, Fmoc-Lys(Alloc)-OH, Fmoc-Lys(Boc)-OH, Fmoc-Met-OH, Fmoc-Phe-OH, Fmoc-Pro-OH, Fmoc-Ser(*t*Bu)-OH, Fmoc-Thr(*t*Bu)-OH, Fmoc-Thz-OH, Fmoc-Tyr(*t*Bu)-OH, Fmoc-Val-OH. The following pseudoproline dipeptides from NovaBiochem were used: Fmoc-Tyr(*t*Bu)-Thr( $\psi^{\text{Me,Me}}$ pro)-OH, Fmoc-Glu(OtBu)-Thr( $\psi^{\text{Me,Me}}$ pro)-OH, Fmoc-Lys(Boc)-Thr( $\psi^{\text{Me,Me}}$ pro)-OH, Fmoc-Ile-Ser( $\psi^{\text{Me,Me}}$ pro)-OH, Fmoc-Leu-Thr( $\psi^{\text{Me,Me}}$ pro)-OH, Fmoc-Ile-Thr( $\psi^{\text{Me,Me}}$ pro)-OH and Fmoc-Asp(OtBu)-Ser( $\psi^{\text{Me,Me}}$ pro)-OH. Upon completion of automated synthesis on a 0.1 mmol scale, the peptide resin was washed into a peptide synthesis vessel with MeOH. The resin was subjected to a cleavage cocktail (1/1/8 of acetic acid/trifluoroethanol/methylene chloride, 10 ml) for 30 min and filtered. The process was repeated three times and the combined washings were evaporated *in vacuo*. The oily residue so obtained, was precipitated with cold ether and centrifuged. The precipitate was suspended in a mixture of acetonitrile and water, frozen in liquid nitrogen and subsequently lyophilized.

## General procedure for removal of acid labile protecting groups with Cocktail B

Peptide were subjected to cocktail B consisting of trifluoroacetic acid (88% by volume), water (5% by volume), phenol (5% by weight), and *i*Pr<sub>3</sub>SiH (2% by volume). The resulting solution was concentrated and the oily residue was triturated in ice cooled diethyl ether (3 x 45 ml) to give a white suspension, which was centrifuged. The precipitate was solubilized in water/acetonitrile (1:1) and lyophilized. The resulting material was subjected to HPLC purification.

### **Native Chemical Ligation buffer**

The buffer required for native chemical ligation (NCL) was freshly prepared prior to the reaction. Guanidinium hydrochloride (5.73 g, 63.3 mmol) was solubilized in water (5 mL), followed by the addition of  $\text{Na}_2\text{HPO}_4 \cdot 7\text{H}_2\text{O}$  (536 mg, 2.0 mmol) and TCEP·HCl (54.0 mg, 0.19 mmol). After complete solubilization, the pH was adjusted to 6.9 with solid  $\text{Na}_3\text{PO}_4$ . Thiophenol (0.3 ml, 3 mmol) was added, thoroughly mixed and the final volume was made up to 10 ml. The pH was then adjusted to pH = 7.4 by the addition of small portions of solid  $\text{Na}_3\text{PO}_4$ . The resulting solution was degassed by bubbling argon through the solution for 30 min. The solution so obtained was used as a buffer for NCL reactions.

### **Thz group deprotection buffer**

The buffer required for the deprotection of the Thz protecting group on terminal cysteines was freshly prepared prior to the reaction.  $\text{NH}_2\text{OMe} \cdot \text{HCl}$  (501 mg, 6.0 mmol), Guanidinium hydrochloride (5.43g, 6.0 mmol), TCEP·HCl (50 mg, 0.18 mmol) were combined in a falcon tube and water (4.0 ml) was added and the contents were thoroughly solubilized. The final volume was made up to 10 ml and the solution was degassed by bubbling a stream of argon through the solution for 30 min.

## Abbreviations

|          |                                                                                |
|----------|--------------------------------------------------------------------------------|
| DBU      | 1,8-Diazabicyclo[5.4.0]undec-7-ene                                             |
| DCC      | N,N'-Dicyclohexylcarbodiimide                                                  |
| DCM      | Dichloromethane                                                                |
| DIEA     | <i>N,N</i> -diisopropylethylamine                                              |
| DMF      | <i>N,N</i> -dimethylformamide                                                  |
| DMSO     | Dimethylsulfoxide                                                              |
| HATU     | 2-(1H-7-Azabenzotriazol-1-yl)--1,1,3,3-tetramethyl uronium hexafluorophosphate |
| HOObt    | 3,4-Dihydro-3-hydroxy-4-oxo-1,2,3-benzotriazine                                |
| HPLC     | High-performance liquid chromatography                                         |
| LC-MS    | Liquid chromatography-Mass spectroscopy                                        |
| MeCN     | Acetonitrile                                                                   |
| NMP      | <i>N</i> -methyl-2-pyrrolidone                                                 |
| PyBOP    | benzotriazol-1-yl-oxytripyrrolidinophosphonium hexafluorophosphate             |
| RT       | Retention time                                                                 |
| SPPS     | Solid phase peptide synthesis                                                  |
| TCEP·HCl | <i>tris</i> (2-carboxyethyl)phosphine hydrochloride                            |
| TFA      | Trifluoroacetic acid                                                           |
| TFE      | Trifluoroethanol                                                               |
| THF      | Tetrahydrofuran                                                                |
| UPLC     | Ultra-performance liquid chromatography                                        |

For details regarding the synthesis and spectral data of compound **14** see P. N. Nagorny, B. Fasching, X. Li, G. Chen, B. Aussedat, S. J. Danishefsky, *J. Am. Chem. Soc.* **2009**, *131*, 5792–5799 [Reference 19 in main text].

### H-Phe-SPh·HCl **16**

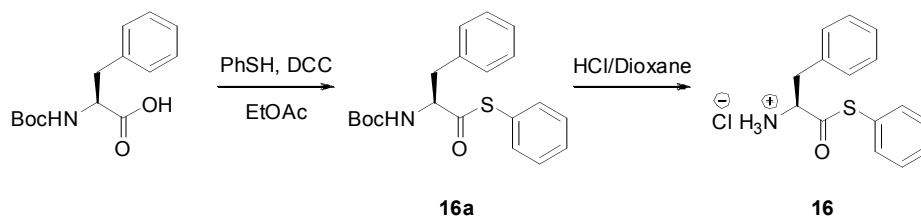

To a solution of Boc-Phe-OH (3.64 g, 13.7 mmol), thiophenol (1.68 ml, 98 mmol) in dry EtOAc (40 mL) at r.t. was added *N,N'*-Dicyclohexylcarbodiimide (DCC) (3.40 g, 16.4 mmol) and the resulting solution was stirred for 1 h. The reaction was checked for completion by TLC, then quenched with glacial acetic acid (165  $\mu$ L), filtered through Celite and concentrated *in vacuo*. The crude material was purified by flash column chromatography (SiO<sub>2</sub>, EtOAc/Hexanes 1:10) to provide 3.1 g (68% yield) of the pure product **16a**.

To **16a** (3.31 g, 9.26 mmol) was added a solution of HCl in dioxane (4 M, 10 ml) and the solution was stirred at r.t for 1 h. The mixture was concentrated *in vacuo* and the remaining solvent was azeotropically removed with dry toluene (2 x 20 mL) followed by DCM (2 x 20 mL) and dried under high vacuum to provide 2.74 g (99% yield) of the pure product **16**.

<sup>1</sup>H NMR (600 MHz, CD<sub>3</sub>OD): 7.46 (3H, m), 7.36 (7H, m), 4.86 (3H, bs), 4.61 (1H, t, J = 7.2 Hz), 3.33 (1H, dd, J = 7.2, 14.1 Hz), 3.26 (1H, dd, J = 7.2, 14.1 Hz). <sup>13</sup>C NMR (150 MHz, CD<sub>3</sub>OD) 195.9, 135.9, 135.1, 131.6, 130.9, 130.9, 130.8, 130.4, 129.3, 126.7, 61.2, 38.9. Exact mass calcd. for C<sub>15</sub>H<sub>16</sub>NO<sub>2</sub>Cl [M-Cl]<sup>+</sup> 258.0953, Found 258.0948.

## H-Trp-SPh-HCl **19**

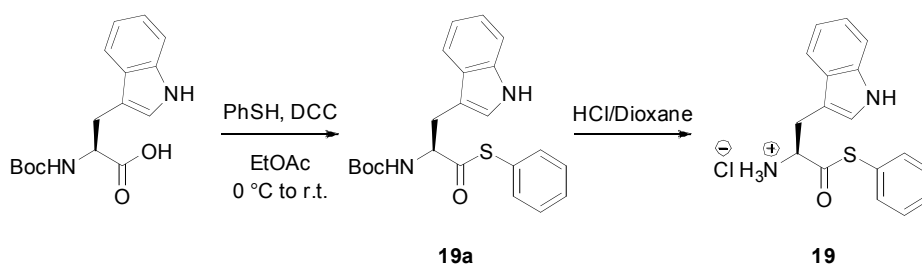

To a solution of Boc-Trp-OH (1.0 g, 3.29 mmol), thiophenol (403  $\mu$ L, 3.95 mmol) in dry EtOAc (10 mL) at 0 °C was added *N,N'*-Dicyclohexylcarbodiimide (DCC) (814 mg, 3.95 mmol) and the solution was stirred at 0 °C for 30 min and at r.t for 1 h. The reaction was checked for completion by TLC and then quenched with AcOH (70  $\mu$ L) filtered through Celite and concentrated *in vacuo*. The crude material was purified by flash column chromatography (SiO<sub>2</sub>, EtOAc/Hexane 1:4 to 1:2) to provide 1.20 g (92% yield) of the pure product **19a**.

To **19a** (1.09 g, 2.75 mmol) was added a solution of HCl in dioxane (4 M, 10 ml) and the solution was stirred at r.t for 1 h. The mixture was concentrated *in vacuo* and the remaining solvent was azeotropically removed with dry toluene (2 x 20 mL) followed by DCM (2 x 20 mL) and dried under high vacuum to provide 870 mg (95% yield) of the pure product **19**.

<sup>1</sup>H NMR (600 MHz, CD<sub>3</sub>OD): 7.58 (1H, d, J = 7.9 Hz), 7.45 (1H, d, J = 7.3 Hz), 7.42 (3H, m), 7.27 (2H, d, J = 8.2 Hz), 7.26 (1H, s), 7.17 (1H, td, J = 0.9, 7.1 Hz), 7.08 (1H, td, J = 0.9, 7.1 Hz), 4.87 (4H, bs), 4.59 (1H, t, J = 7.1 Hz), 3.54 (1H, dd, J = 7.0, 14.8 Hz), 3.42 (1H, dd, J = 7.2, 14.8 Hz). <sup>13</sup>C NMR (150 MHz, CD<sub>3</sub>OD) 196.5, 138.4, 135.9, 131.4, 130.7, 128.5, 126.8, 125.9, 123.1, 120.5, 119.2, 112.9, 107.5, 60.7, 29.2.  $[\alpha]_D^{20} = +89.54$  (c = 0.685 in TFE/DCM 1:1). Exact mass calcd. for C<sub>17</sub>H<sub>17</sub>N<sub>2</sub>O<sub>2</sub>SCl [M-Cl]<sup>+</sup> 297.1062, Found 297.1061.

## Dodecasaccharide glycosylamine **7**.

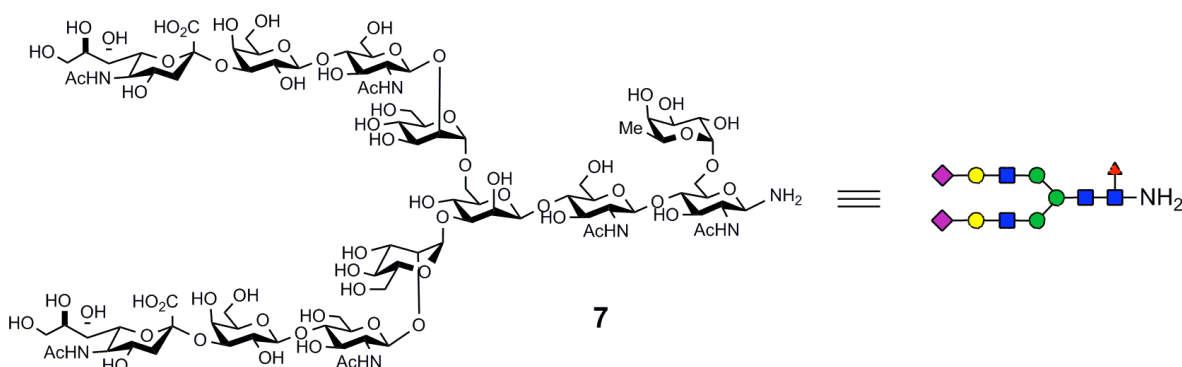

Dodecasaccharide **14** (11 mg, 4.23  $\mu\text{mol}$ ) was dissolved in water (5 mL) and  $(\text{NH}_4)\text{HCO}_3$  (6g, BioUltra, 99.5% (T), Cat. No. 09830 Fluka) was slowly introduced in small portions while stirring. The resultant slurry was warmed to 40  $^\circ\text{C}$  and stirred for 3 days at this temperature.  $(\text{NH}_4)\text{HCO}_3$  was periodically added to ensure a saturated content of ammonia in the solution. After three days, the stirring was turned off and the clear supernatant was transferred to a BD Falcon<sup>TM</sup> tube and frozen in liquid nitrogen. The remaining material was quickly dissolved in minimum amount of cold water, transferred to separate falcon tube and frozen in liquid nitrogen. The frozen material was lyophilized to remove the excess  $(\text{NH}_4)\text{HCO}_3$  and water. The lyophilization was deemed complete until the mass of the product remained constant. This provided a white solid, the **dodecasaccharide glycosylamine 7** (11 mg, 99 % yield).

Exact mass calcd. for  $\text{C}_{90}\text{H}_{149}\text{N}_7\text{O}_{65}$   $[\text{M}-2\text{H}]^{2-}$  1182.9, Found 1182.8.

MALDI-TOF calcd. for  $\text{C}_{90}\text{H}_{149}\text{N}_7\text{O}_{65}$   $[\text{M}+\text{Na}]^+$  2391.85, Found 2391.44.



## **[ $\beta$ FSH<sup>1-19</sup>] phenylthioester 17**

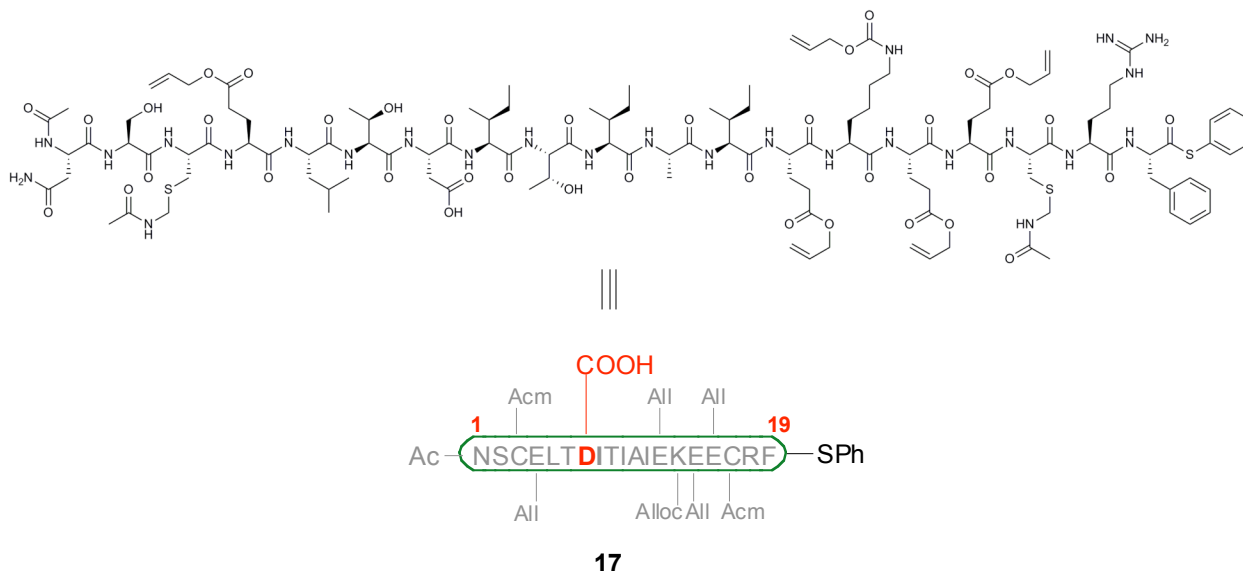

0.21 g (0.05 mmol) of Fmoc-Arg(Pbf)-Nova-TGT resin was subjected to continuous flow automated peptide synthesis following the general procedure for SPPS. The amino acids used in the sequence were as follows: Fmoc-Cys(Acm)-OH, Fmoc-Glu(OAllyl)-OH, Fmoc-Glu(OAllyl)-OH, Fmoc-Lys(Alloc)-OH, Fmoc-Glu(OAllyl)-OH, Fmoc-Ile-OH, Fmoc-Ala-OH, Fmoc-Ile-OH, Fmoc-Ile-Thr( $\psi^{\text{Me,Me}}$ pro)-OH, Fmoc-Asp(OtBu)-OH, Fmoc-Leu-Thr( $\psi^{\text{Me,Me}}$ pro)-OH, Fmoc-Glu(OAllyl)-OH, Fmoc-Cys(Acm)-OH, Fmoc-Ser(*t*Bu)-OH, Fmoc-Asn(Trt)-OH. The resin from above was transferred to a manual peptide synthesis vessel, washed with DMF (10 mL), and treated with 2:2:1 DMF/Pyridine/ $\text{Ac}_2\text{O}$  (10 mL) for 45 min. The solvent was drained and the resin was washed with DMF and methanol, and treated with the cleavage solution (10 mL) consisting of 1:1:8 trifluoroethanol/acetic acid/dichloromethane for 1.5 h. The beads were filtered, rinsed with another 10 mL of cleavage solution, filtered again, and then treated for another 1 h with 10 mL of the cleavage solution. This process was repeated for a total of three times over 2 h cleavage cycles, and the combined filtrate was concentrated *in vacuo* to afford 80 mg of [ $\beta$ FSH<sup>1-18</sup>] peptide 15 after cleavage.

The [ $\beta$ FSH<sup>1-18</sup>] peptide 15 from above (103 mg, 0.0322 mmol) was combined with HCl·H-Trp-SPh 16 (14.2 mg, 0.0483 mmol), HOObt (7.9 mg, 0.0483 mmol), and dissolved in 1:3

TFE/CHCl<sub>3</sub> (2.0 mL). To this solution, EDC (11 μL, 0.0483 mmol) was added and the resultant yellow solution was stirred for 2 h before being concentrated under reduced pressure.

The residue from above was treated with Cocktail B (3 mL) for 3.5 h, then diluted with dichloromethane, and concentrated. The residue was triturated with ether (2 x 15 mL), decanted, and dissolved in DMSO (3 ml) and acetonitrile/water (8:2, 10 mL) and purified by HPLC. (Microsorb C4 column, 30-90% MeCN in H<sub>2</sub>O, 30 min, RT = 25.5 min) to afford 15.5 mg (21% yield, 2 steps) of pure **[βFSH<sup>1-19</sup>] phenylthioester 17**.

Exact mass calcd for C<sub>123</sub>H<sub>188</sub>N<sub>26</sub>O<sub>38</sub>S<sub>3</sub> [M+3H]<sup>3+</sup> 912.1, Found 912.60; [M+2H]<sup>2+</sup> 1368.2, Found 1368.40.

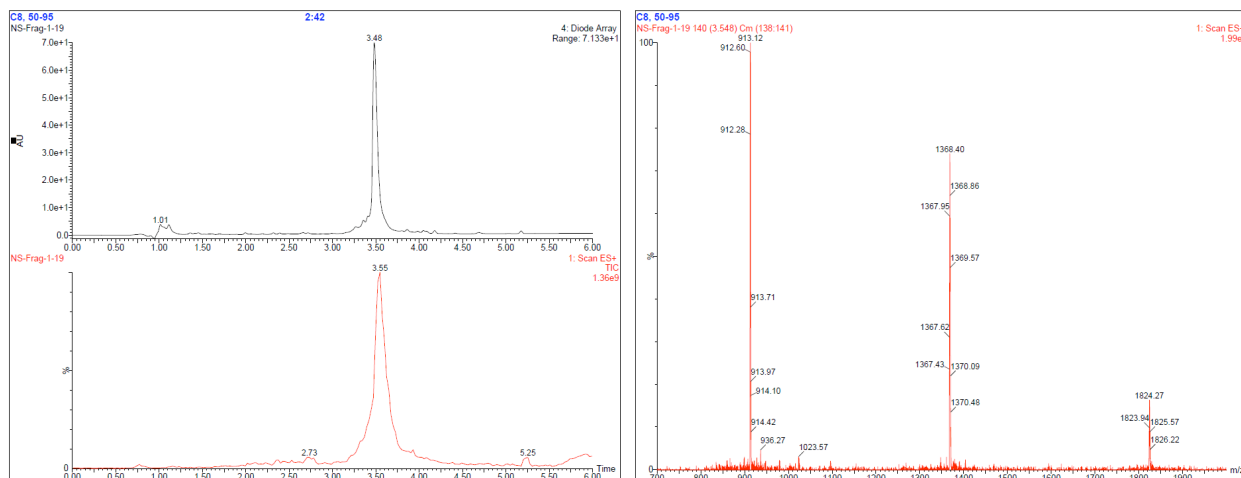

## [ $\beta$ FSH<sup>1-19</sup>] glycopeptide phenylthioester **5**

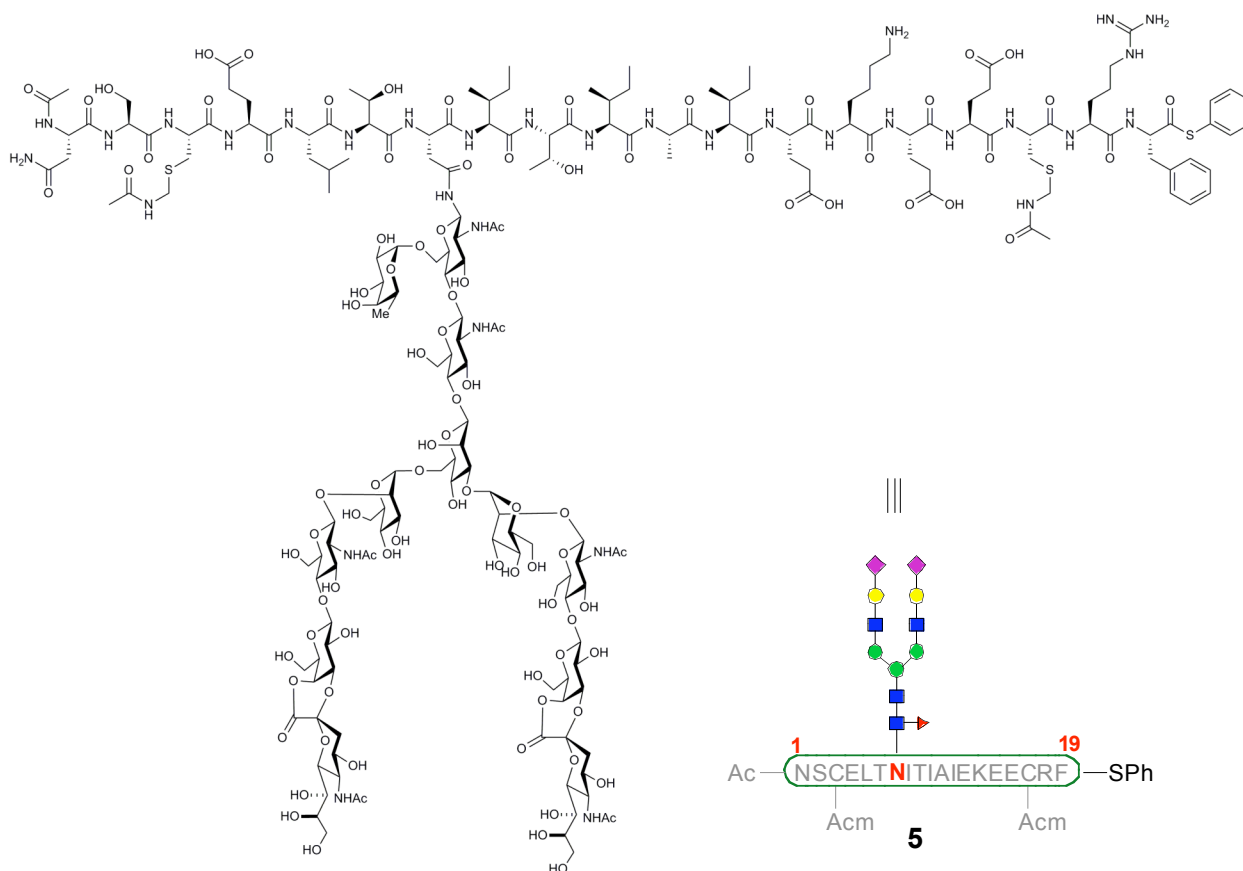

To a vial containing [ $\beta$ FSH<sup>1-19</sup>] phenylthioester **17** (2.8 mg, 1.02  $\mu$ mol) and the dodecasaccharide **7** (2.02 mg, 0.85  $\mu$ mol) under argon, was added a solution of HATU in DMSO (conc = 174 mg/ml, 18  $\mu$ l) followed by a stock solution of DIEA in DMSO (conc. 40  $\mu$ l/ml, 18  $\mu$ l). The mixture was stirred for 1 h at r.t. at which time an aliquot of the reaction was monitored using LC-MS (Microsorb C4 column, 30-90% MeCN in H<sub>2</sub>O, 30 min, RT = 19.8 min)

Exact mass calcd. for C<sub>213</sub>H<sub>331</sub>N<sub>33</sub>O<sub>100</sub>S<sub>3</sub>: [M+3H]<sup>3+</sup> 1684.04, Found 1684.49.

To a solution of Pd(PPh<sub>3</sub>)<sub>4</sub> (0.5 mg) in NMP (1ml) was added phenylsilane (10  $\mu$ l). The resulting solution (250  $\mu$ l) was added to the previous reaction mixture and stirred for 1 h. The reaction was monitored by LC-MS. Additional 50  $\mu$ l of the Pd(PPh<sub>3</sub>)<sub>4</sub> solution (freshly prepared) was added and stirred for another 20 mins. The reaction mixture was then quenched with acetic acid (1  $\mu$ l) and diluted with DMSO (2 ml). The resulting mixture was immediately purified by HPLC (Microsorb C18 column, 20-70% MeCN in H<sub>2</sub>O, 30 min, RT = 16.7 min). The combined

fractions of the pure product, upon lyophilization gave 1.0 mg (23% yield, 2 steps) of [ $\beta$ FSH<sup>1-19</sup>] glycopeptide phenylthioester **5**.

Exact mass calcd. for C<sub>197</sub>H<sub>311</sub>N<sub>33</sub>O<sub>98</sub>S<sub>3</sub>: [M+4H]<sup>4+</sup> 1202.24, Found 1202.57; [M+3H]<sup>3+</sup> 1602.66, Found 1603.05.

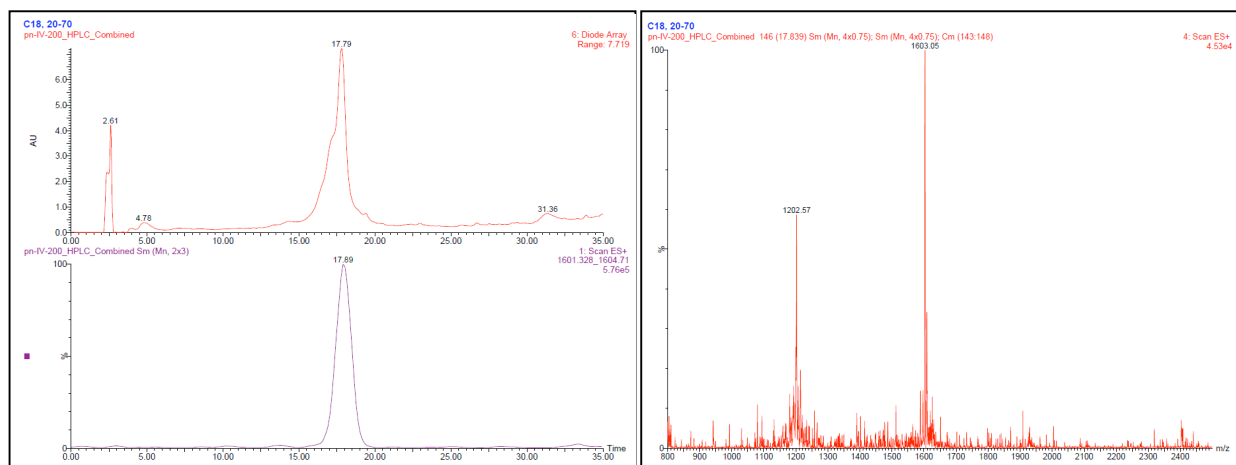

## [ $\beta$ FSH<sup>20-27</sup>] phenylthioester **6**

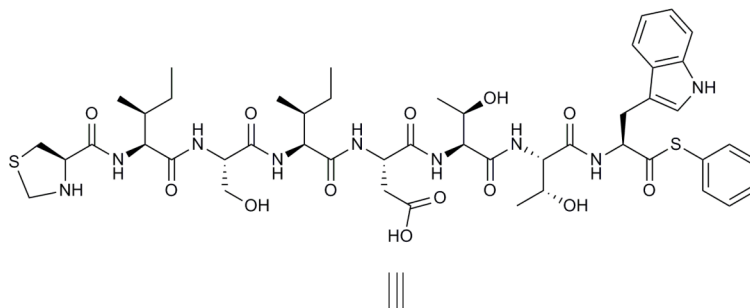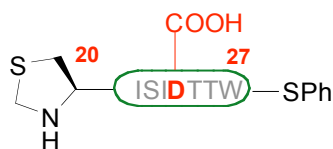

**6**

0.42 g (0.1 mmol) of Fmoc-Thr(*t*Bu)-Nova-TGT resin was subjected to continuous flow automated peptide synthesis following the general procedure for SPPS. The amino acids used were, in order of synthesis: Fmoc-Thr(*t*Bu)-OH, Fmoc-Asp(*t*Bu)-OH, Fmoc-Ile-Ser( $\psi^{\text{Me,Me}}$ pro)-OH, Fmoc-Ile-OH, Fmoc-Thz-OH. The resin was transferred to a manual peptide synthesis vessel, washed with methanol (10 mL), and treated with the cleavage solution (10 mL) consisting of 1:1:8 trifluoroethanol/acetic acid/dichloromethane for 1.5 h. The beads were filtered, rinsed with another 10 mL of cleavage solution, filtered again, and then treated for another 1 h with 10 mL of the cleavage solution. This process was repeated for a total of three 2-hour cleavage cycles, and the combined filtrate was concentrated *in vacuo* to afford 101 mg of peptide [ $\beta$ FSH<sup>20-26</sup>] after cleavage (99% yield). Exact mass calcd for C<sub>51</sub>H<sub>89</sub>N<sub>7</sub>O<sub>15</sub>S: [M+H]<sup>+</sup> 1072.6, Found 1072.8; [M+Na]<sup>+</sup> 1094.6, Found 1094.7; [M+TFA]<sup>-</sup> 1184.6, Found 1184.8; [M-H]<sup>-</sup> 1070.5, Found 1070.8.

Peptide [ $\beta$ FSH<sup>20-26</sup>] peptide **18** (20 mg, 0.018 mmol) was combined with HCl·H-Phe-SPh **19** (11 mg, 0.0575 mmol), HOObt (6 mg, 0.037 mmol), and dissolved in 1:3 TFE/CHCl<sub>3</sub> (1.0 mL). To this solution, EDC (6.5  $\mu$ L, 0.037 mmol) was added and the resultant yellow solution was stirred for 2.5 h before and subsequently concentrated *in vacuo* to provide product (30 mg) of the crude product.

Exact mass calcd for  $C_{68}H_{103}N_9O_{15}S_2$ :  $[M+H]^+$  1350.71, Found 1351.00

The peptide [ **$\beta$ FSH<sup>20-27</sup>**] **phenylthioester** so obtained, was treated with cocktail B (2 mL) for 2 h, then diluted with dichloromethane, and concentrated. The residue was triturated with ice-cold ether (2 x 15 mL), centrifuged and decanted. The precipitate was re-dissolved in DMSO (3 mL) and acetonitrile/water (7:3, 10 mL), and purified by HPLC. (Microsorb C18 column, 30-60% MeCN in H<sub>2</sub>O over 30 min, RT = 14.5 min) to afford 13 mg (66%, 3 steps) of pure [ **$\beta$ FSH<sup>20-27</sup>**] **phenylthioester 6**.

Exact mass calcd for  $C_{48}H_{68}N_9O_{13}S_2$ :  $[M+H]^+$  1042.44, Found : 1042.69.

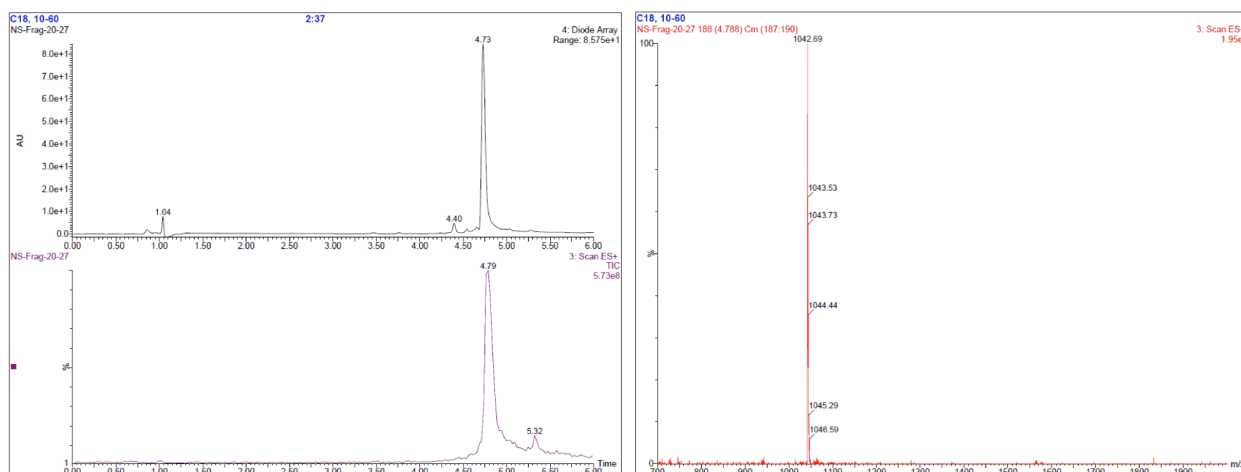

## [ $\beta$ FSH<sup>20-27</sup>] glycopeptide phenylthioester **4**

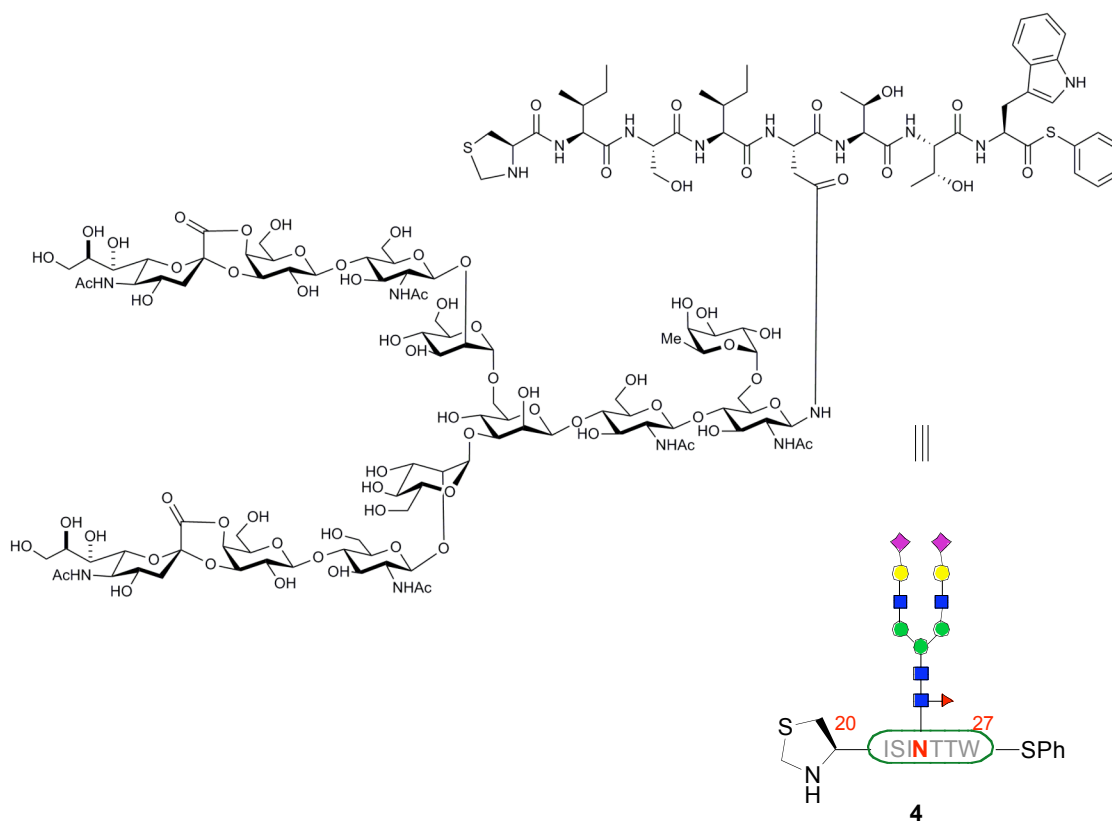

To a vial containing [ $\beta$ FSH<sup>20-27</sup>] phenylthioester **6** (660  $\mu$ g, 0.63  $\mu$ mol) and the dodecasaccharide **7** (1.0 mg, 0.42  $\mu$ mol) was flushed with argon. To this was added a premixed solution of DIEA (0.32 mg, 2.52  $\mu$ mol) in DMSO (20  $\mu$ l) followed by a premixed solution of HATU (1.92 mg, 5  $\mu$ mol). The mixture turned yellow and this solution was stirred at r.t. for 1 h. An aliquot of the reaction mixture was analyzed by LC-MS and indicated complete conversion to the desired product. After 2 h of stirring, the reaction mixture was quenched with acetic acid (2  $\mu$ l) and diluted with DMSO (200  $\mu$ l) and water (400  $\mu$ l). This was immediately purified by HPLC (Microsorb C18 column, 20-70% MeCN in H<sub>2</sub>O over 30 min, RT = 14.9 min) to provide 400  $\mu$ g (28% yield) of the pure product **4**.

Exact mass calcd. for C<sub>138</sub>H<sub>210</sub>N<sub>16</sub>O<sub>75</sub>S<sub>2</sub>: [M+2H]<sup>2+</sup> 1679.14, Found 1679.62; [M+3H]<sup>3+</sup> 1119.76, Found 1119.99.

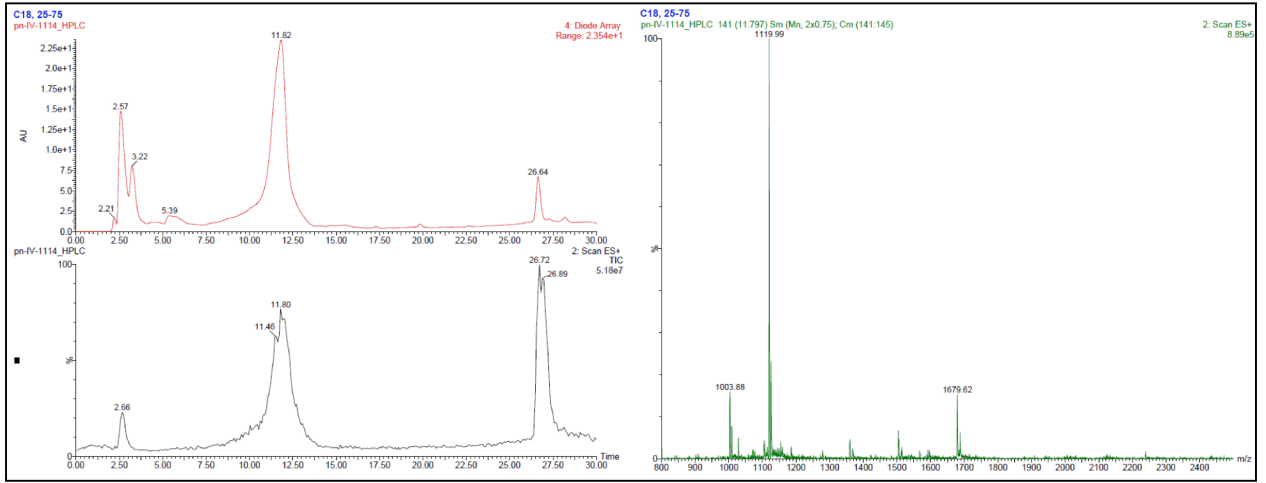



## [ $\beta$ FSH<sup>28-65</sup>] phenylthioester **20**

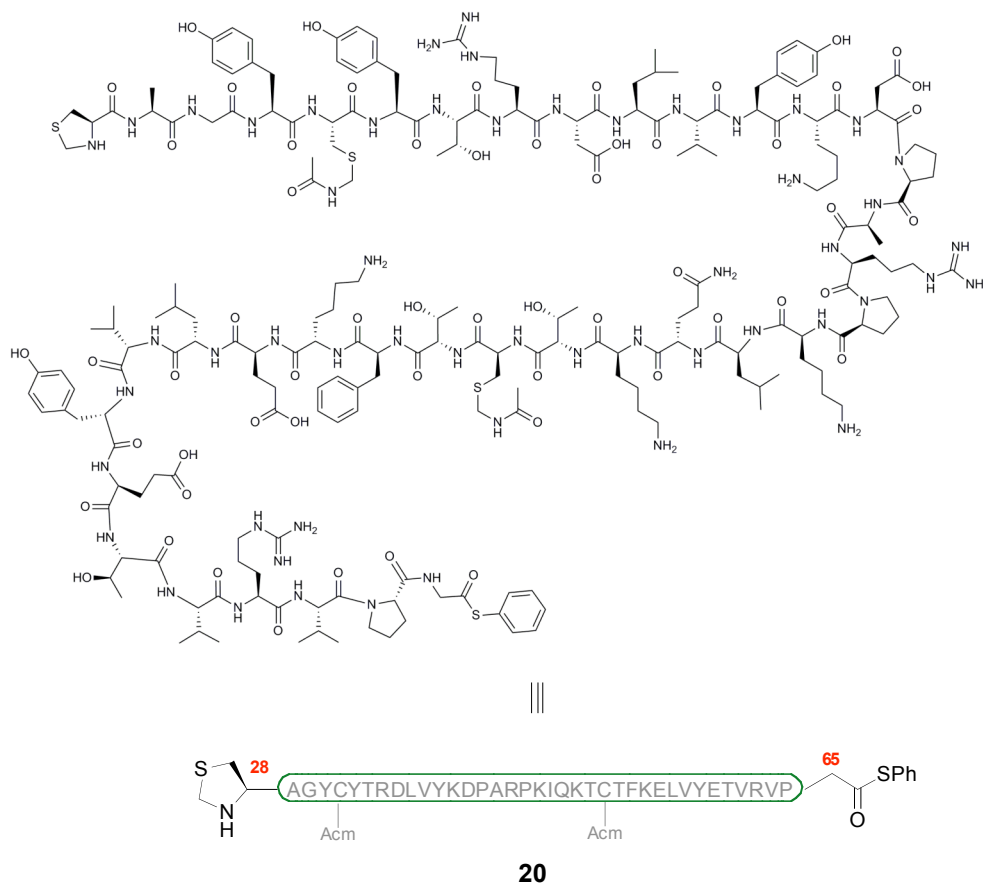

0.56 g (0.10 mmol) of Fmoc-Gly-Nova-TGT resin was subjected to continuous flow automated peptide synthesis following the general procedure for SPPS. Fmoc-Thz-OH was used for position 28 and Fmoc-Glu(*O*tBu)-Thr( $\psi^{\text{Me,Me}}$ pro)-OH, Fmoc-Lys(Boc)-Thr( $\psi^{\text{Me,Me}}$ pro)-OH and Fmoc-Tyr(*t*Bu)-Thr( $\psi^{\text{Me,Me}}$ pro)-OH dipeptides were used to substitute for the corresponding amino acids at positions 59-60, 54-55 and 33-34 respectively. Upon cleavage from the resin the procedure afforded 520 mg (79% yield) of [ $\beta$ FSH<sup>28-65</sup>] peptide.

Exact mass calcd for C<sub>333</sub>H<sub>508</sub>N<sub>54</sub>O<sub>77</sub>S<sub>6</sub>: [M+5H]<sup>5+</sup> 1339.13, Found 1339.52; [M+4H]<sup>4+</sup> 1673.65, Found 1673.92.

The product from above (190 mg, 28.8  $\mu$ mol) was combined with thiophenol (88  $\mu$ L, 0.86 mmol), PyBOP (150 mg, 0.29 mmol), and DIEA (49  $\mu$ L, 0.29 mmol) in dichloromethane (3mL) and THF (3 mL). The reaction mixture was stirred for 3 h before being concentrated and used

without further purification in the next reaction. The prepared above thioester was dissolved in 6.5 mL of Cocktail B and stirred for 3 h at rt before being concentrated, triturated with ether (2 x 15 mL), decanted. The crude product was redissolved in acetonitrile/water (1:1, 15 mL), frozen in liquid nitrogen and lyophilized. The crude mass so obtained was purified by HPLC (Microsorb C18 column, 10-60% MeCN in H<sub>2</sub>O, 30 min, RT = 23.3 min) to afford 89 mg (62 % over 2 steps) of pure product [**β**FSH<sup>28-65</sup>] phenylthioester **20**.

Exact mass calcd. for C<sub>211</sub>H<sub>326</sub>N<sub>54</sub>O<sub>57</sub>S<sub>4</sub>: [M+6H]<sup>6+</sup> 777.39, Found 777.77; [M+5H]<sup>5+</sup> 932.67, Found 932.76; [M+4H]<sup>4+</sup> 1165.59, Found 1165.88; [M+3H]<sup>3+</sup> 1553.78, Found 1554.34.

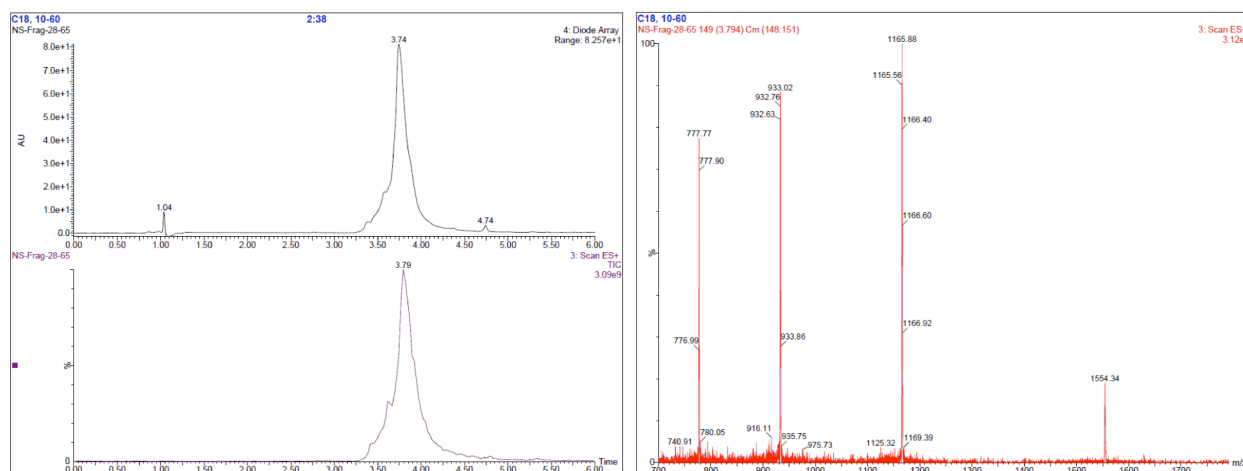

## [ $\beta$ FSH<sup>66-111</sup>] peptide 21

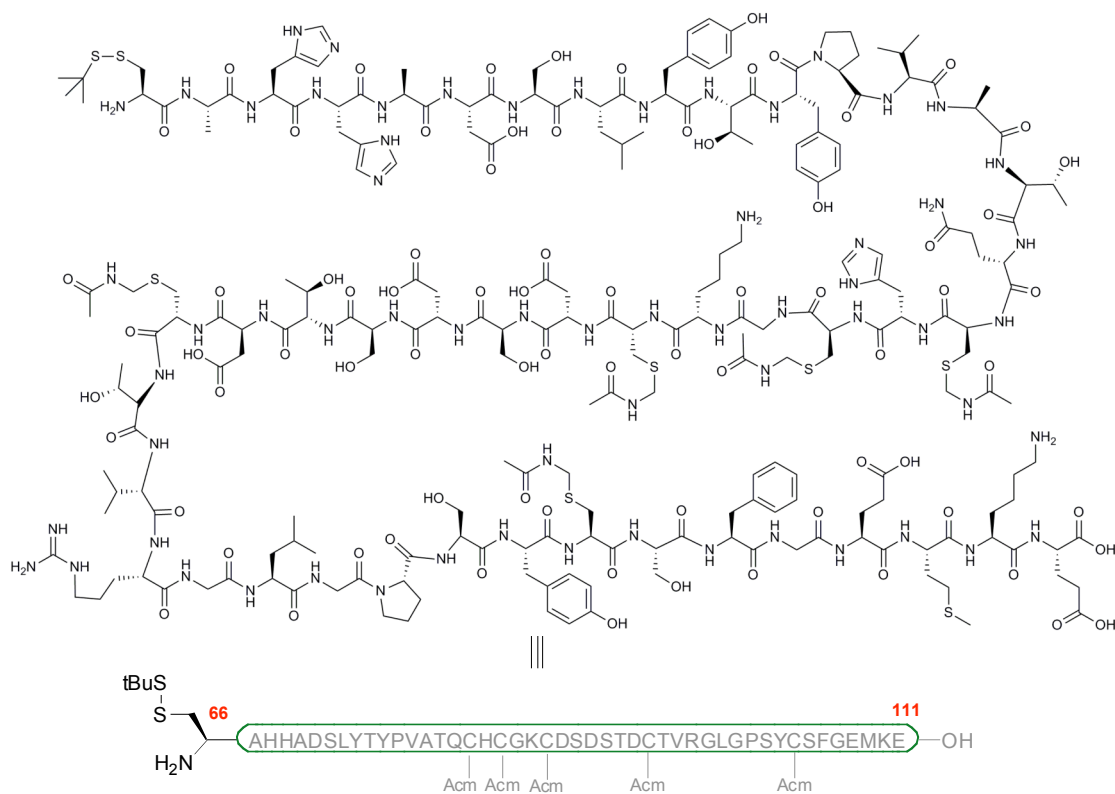

21

0.435 g (0.10 mmol) of Fmoc-Glu(*Ot*Bu)-Nova-TGT resin was subjected to continuous flow automated peptide synthesis following the general procedure. Fmoc-Asp(*Ot*Bu)-Ser( $\psi^{\text{Me,Me}}$ pro)-OH dipeptide was used to substitute for the corresponding amino acids at positions 90-91 and 71-72 respectively. Upon cleavage from the resin the procedure afforded 790 mg of peptide.

The above fragment (790 mg) was dissolved in 12 mL of Cocktail B and stirred for 4 h at rt before being concentrated, triturated with ether (2 x 15 mL), decanted and redissolved in acetonitrile/water (1:1, 15 mL). This solution was purified by HPLC (Microsorb C18 column, 10-60% MeCN in H<sub>2</sub>O, 30 min, RT = 17.55 min) to afford 166 mg (31 % over two steps) of pure product [ $\beta$ FSH<sup>66-111</sup>] peptide 21.

Exact mass calcd. for C<sub>225</sub>H<sub>343</sub>N<sub>63</sub>O<sub>77</sub>S<sub>8</sub>: [M+6H]<sup>6+</sup> 903.89, Found 904.40; [M+5H]<sup>5+</sup> 1084.66, Found 1085.18; [M+4H]<sup>4+</sup> 1355.58, Found 1355.85; [M+3H]<sup>3+</sup> 1806.76, Found 1807.90.

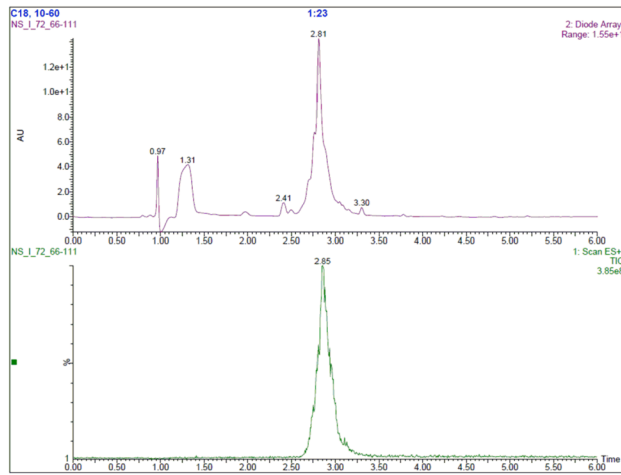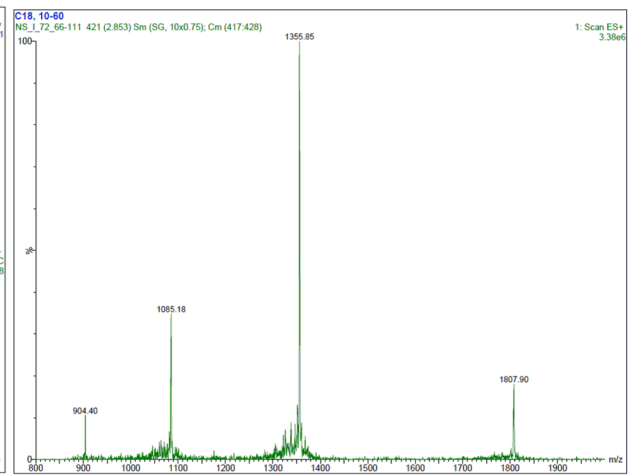

**[ $\beta$ FSH<sup>28-111</sup>] peptide 3**

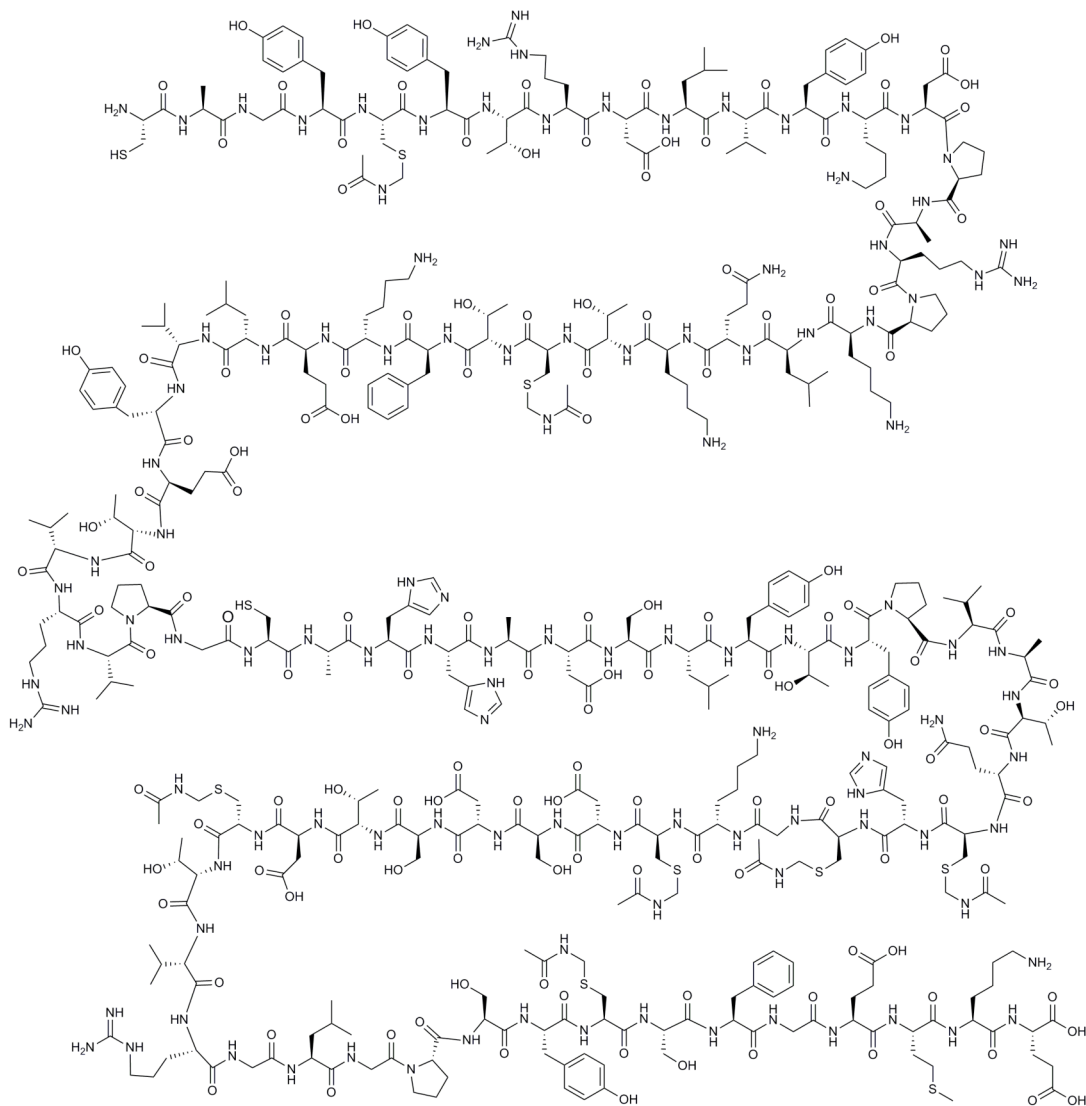

|||

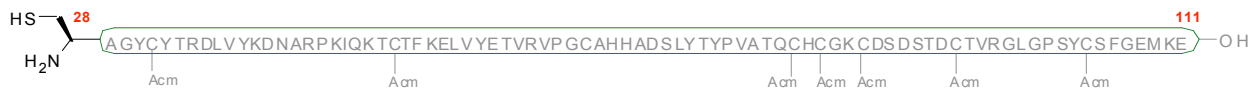

**3**

To a mixture of 28-65 [ $\beta$ FSH<sup>28-65</sup>] phenylthioester **20** (16.4 mg, 3.52  $\mu$ mol), and [ $\beta$ FSH<sup>66-111</sup>] peptide **21** (20.0 mg, 3.69  $\mu$ mol), was added freshly prepared degassed NCL buffer (pH  $\sim$  7.4; 1.0 ml) and the reaction mixture was stirred at r.t. for 24 h. After 24 h, the reaction was checked for completion by LC-MS: (C18 Microsorb column, 10-60% MeCN in H<sub>2</sub>O, 30 min, RT = 19.16 min).

Exact mass calcd for C<sub>426</sub>H<sub>655</sub>N<sub>117</sub>O<sub>134</sub>S<sub>10</sub>: [M+9H]<sup>9+</sup> 1098.62, Found 1098.92; [M+8H]<sup>8+</sup> 1235.82, Found 1236.12; [M+7H]<sup>7+</sup> 1412.22, Found 1412.36.

Upon completion of the previous step, the reaction mixture from above was diluted with Thz deprotection buffer (see general information, 600  $\mu$ l), and the pH of the resultant solution was adjusted to 4.8 by addition of ultrapure conc. HCl. The reaction mixture was stirred for 20 h, and then purified by HPLC (Microsorb C18 column, 10-60% MeCN in H<sub>2</sub>O, 30 min, RT = 20.5 min) to afford 7.7 mg (22 %) of pure product [ $\beta$ FSH<sup>28-111</sup>] peptide **3**.

Exact mass calcd. for C<sub>425</sub>H<sub>655</sub>N<sub>117</sub>O<sub>134</sub>S<sub>10</sub>: [M+5H]<sup>5+</sup> 1974.32, Found 1974.81; [M+6H]<sup>6+</sup> 1645.43, Found 1645.56; [M+7H]<sup>7+</sup> 1410.51, Found 1410.92; [M+8H]<sup>8+</sup> 1234.32, Found 1234.60; [M+9H]<sup>9+</sup> 1097.29, Found 1097.49; [M+10H]<sup>10+</sup> 987.66, Found 987.82; [M+11H]<sup>11+</sup> 897.97, Found 898.1; [M+12H]<sup>12+</sup> 823.22, Found 823.54.

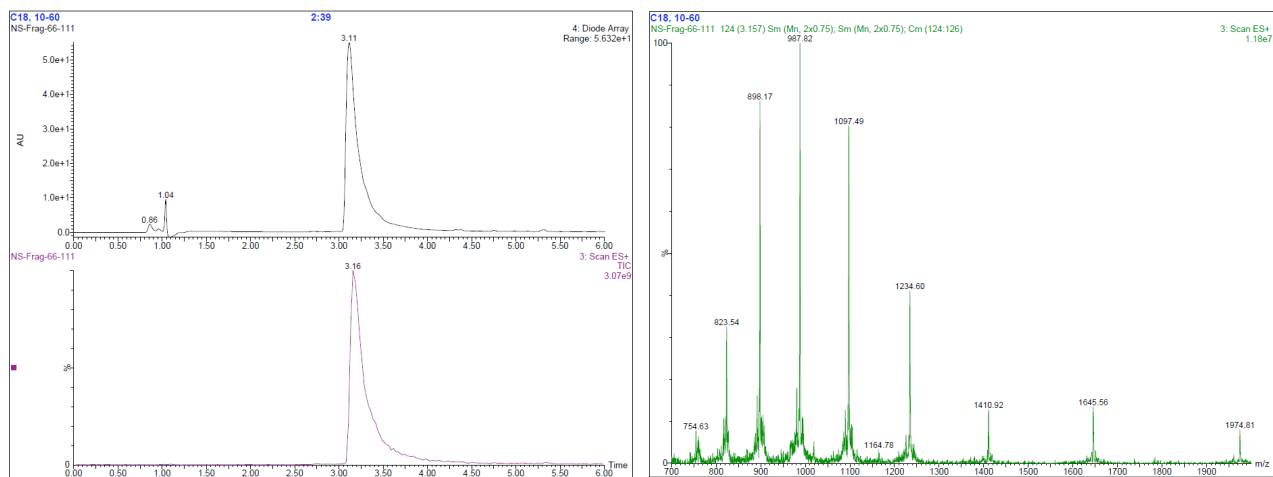

[ $\beta$ FSH<sup>20-111</sup>] glycopeptide 22

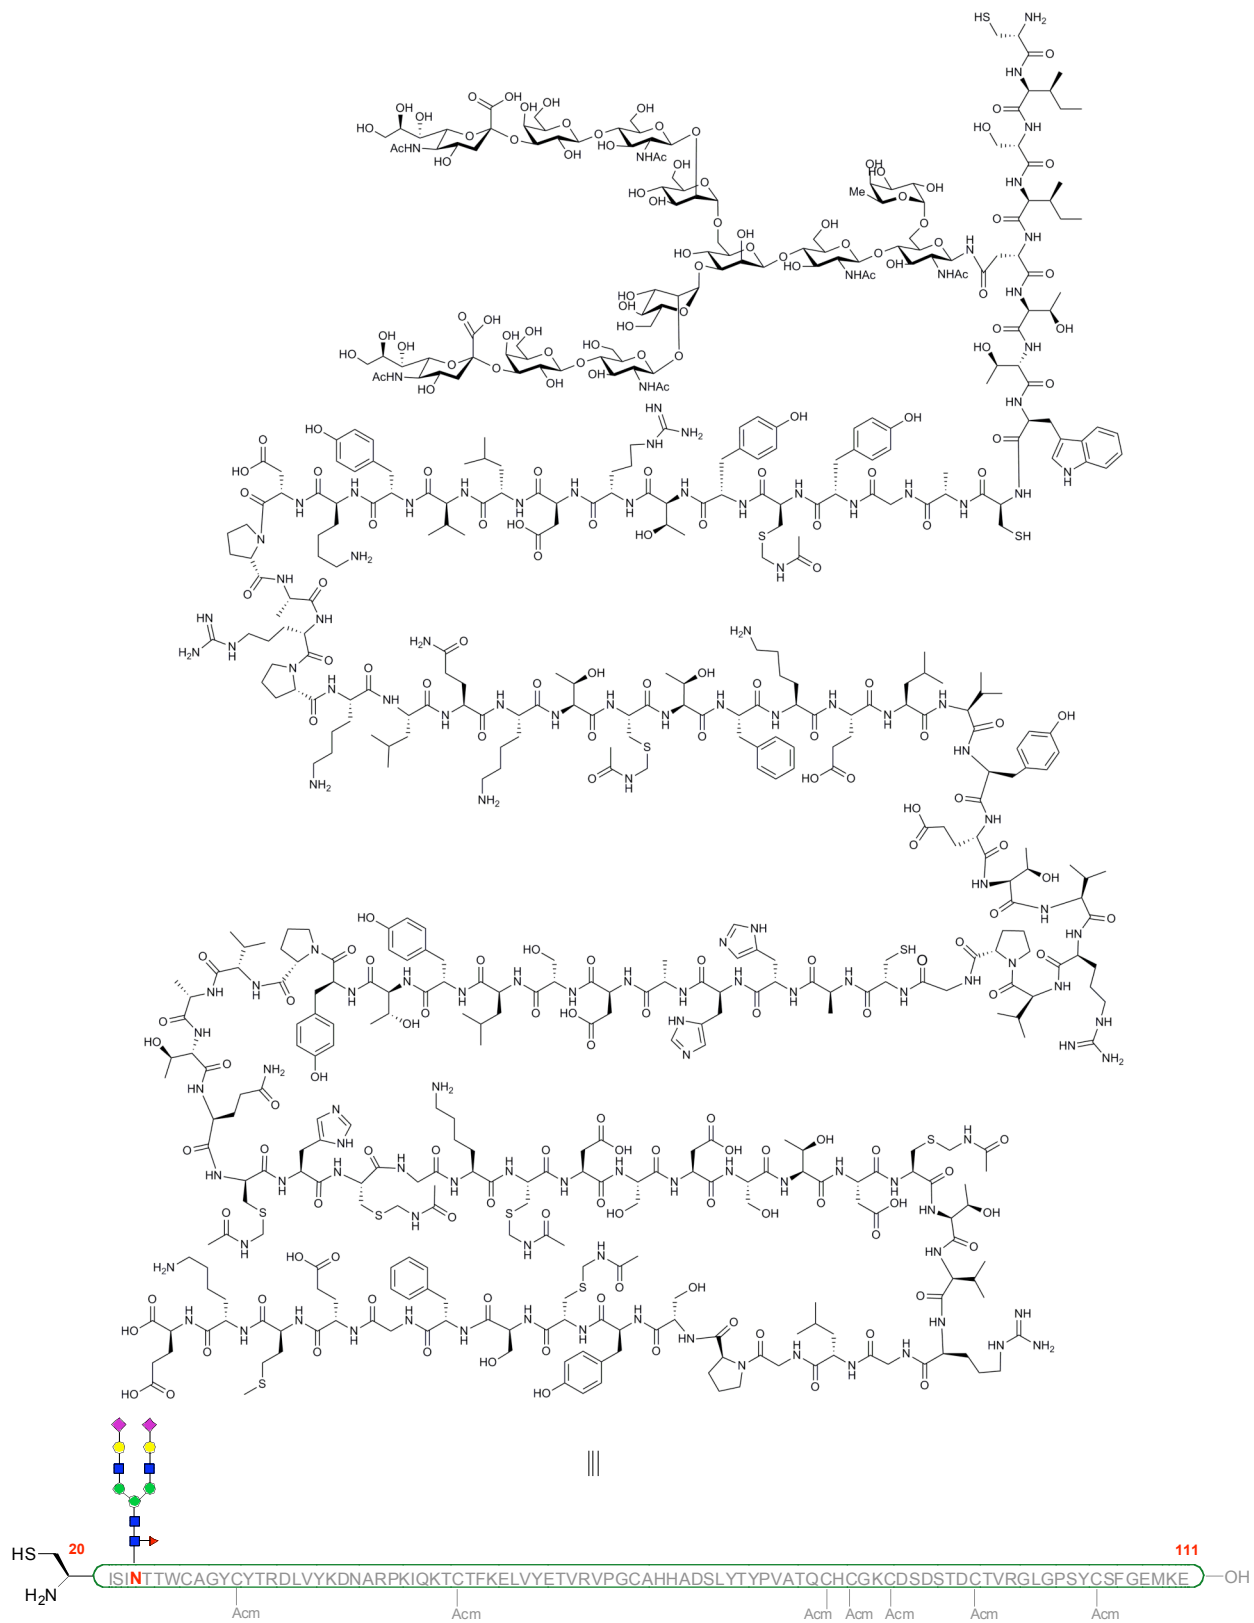

To a vial containing [ $\beta$ FSH<sup>20-27</sup>] glycopeptide **4** (0.6 mg, 0.18  $\mu$ mol) and [ $\beta$ FSH<sup>28-111</sup>] **3** (1.76 mg, 0.178  $\mu$ mol) under argon, was added the degassed NCL buffer (pH = 7.4, 40  $\mu$ l) and the contents were thoroughly mixed and stirred at r.t for 24 h. An aliquot of the reaction mixture was analyzed by LC-MS (Microsorb C18 column, 20-45% MeCN in H<sub>2</sub>O, 30 min, RT = 18.8 min) indicated complete conversion to the desired product. Mass calcd. for C<sub>557</sub>H<sub>863</sub>N<sub>133</sub>O<sub>211</sub>S<sub>11</sub>: [M+10H]<sup>10+</sup> 1315.79, Found 1316.09; [M+8H]<sup>8+</sup> 1644.48, Found 1643.28.

To the above reaction mixture was added the Thz deprotection buffer (see general information, 600  $\mu$ l) and the pH of the resulting solution was adjusted to 4.8 by the addition of ultrapure conc. HCl. The resulting solution was stirred for 24 h. This mixture was purified by HPLC (Microsorb C18 column, 20-45% MeCN in H<sub>2</sub>O, 30 min, RT = 18.8 min) to provide 800  $\mu$ g (34% yield, 2 steps) of the pure [ $\beta$ FSH<sup>20-111</sup>] glycopeptide **24**.

Exact mass calcd for C<sub>557</sub>H<sub>859</sub>N<sub>133</sub>O<sub>209</sub>S<sub>11</sub>: [M+14H]<sup>14+</sup> 939.27, Found 939.76; [M+13H]<sup>13+</sup> 1011.45, Found 1012.22; [M+12H]<sup>12+</sup> 1095.66, Found 1096.13; [M+11H]<sup>11+</sup> 1195.17, Found 1195.92; [M+10H]<sup>10+</sup> 1314.59, Found 1315.35; [M+9H]<sup>9+</sup> 1460.54, Found 1461.35; [M+8H]<sup>8+</sup> 1642.98, Found 1643.87; [M+7H]<sup>7+</sup> 1877.55, Found 1878.61; [M+6H]<sup>6+</sup> 2190.31, Found 2191.34.

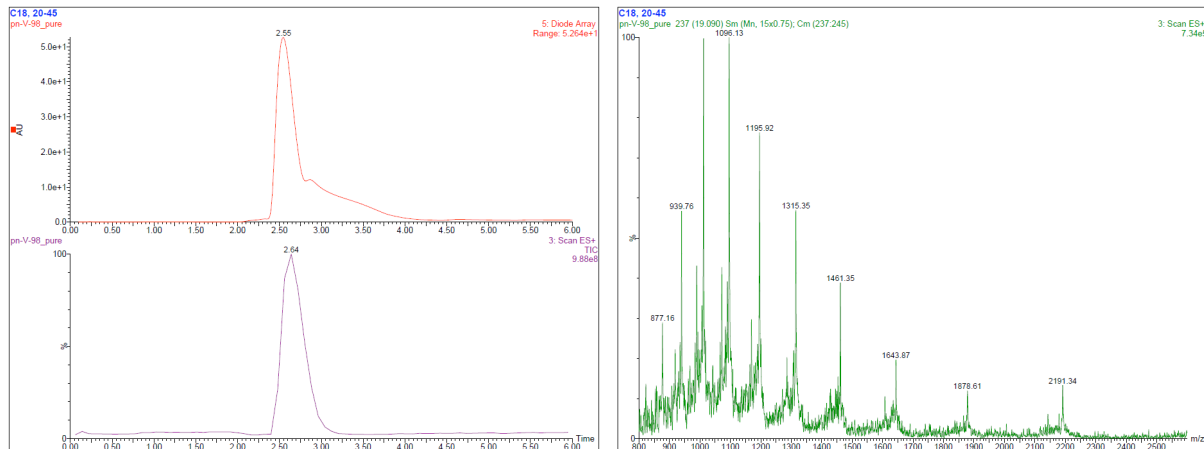





To a vial containing [ $\beta$ FSH<sup>20-111</sup>] glycopeptide **22** (2.0 mg, 0.152  $\mu$ mol) and [ $\beta$ FSH<sup>1-19</sup>] glycopeptide thioester **5** (1.4 mg, 0.291  $\mu$ mol) under argon, was added the degassed NCL buffer (pH = 7.3, 90  $\mu$ l) and the contents were thoroughly mixed and stirred at r.t for 4 h. An aliquot of the reaction mixture was analyzed by LC-MS and indicated partial conversion to the desired product. Additional buffer (90  $\mu$ l) was added and the solution was stirred for an additional 2 h. The mixture was diluted with additional buffer (400  $\mu$ l) and purified by HPLC (Microsorb C18 column, 20-45% MeCN in H<sub>2</sub>O, 30 min, RT = 24.8 min) to provide 700-800  $\mu$ g (28 % yield) pure product [ $\beta$ FSH<sup>1-111</sup>] glycoprotein **2**.

Exact mass calc. for C<sub>747</sub>H<sub>1172</sub>N<sub>166</sub>O<sub>311</sub>S<sub>13</sub>: [M+17H]<sup>17+</sup> 1052.05, Found 1052.19; [M+16H]<sup>16+</sup> 1117.74, Found 1118.81; [M+15H]<sup>15+</sup> 1192.19, Found 1192.47; [M+14H]<sup>14+</sup> 1277.28, Found 1278.62; [M+13H]<sup>13+</sup> 1375.29, Found 1376.77; [M+12H]<sup>12+</sup> 1489.99, Found 1489.80; [M+11H]<sup>11+</sup> 1625.35, Found 1625.44; [M+10H]<sup>10+</sup> 1787.78, Found 1788.52; [M+9H]<sup>9+</sup> 1986.31, Found 1986.05. Reconstructed mass calcd. for [M+H]<sup>+</sup> 17868.77, Found 17869.00. Some peaks corresponding to the loss of sialic acid residues were found in the MS (marked as \*) and were attributed to ionization.

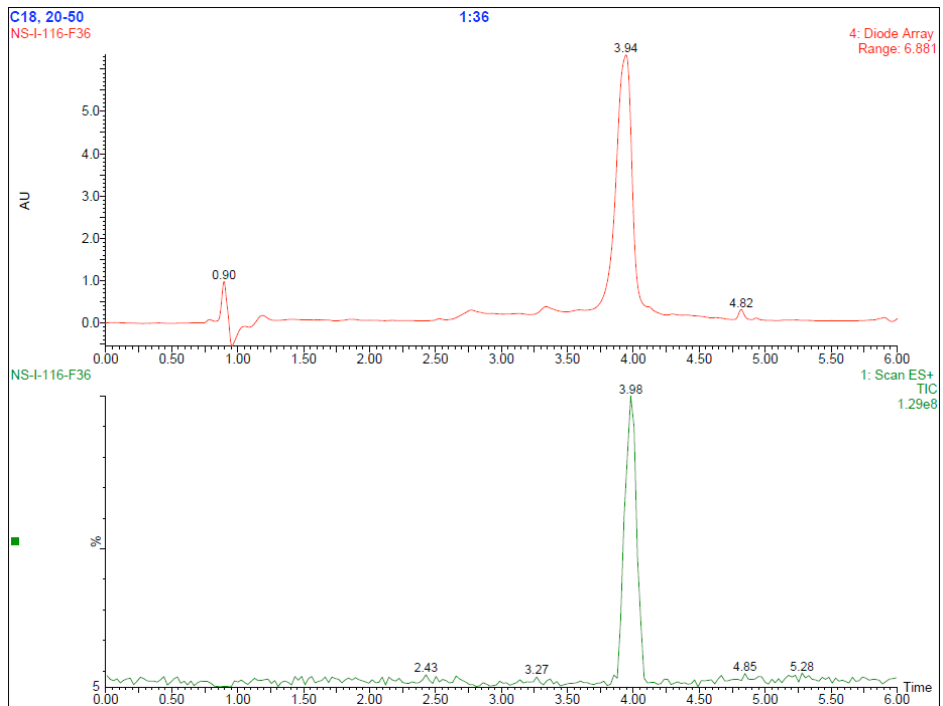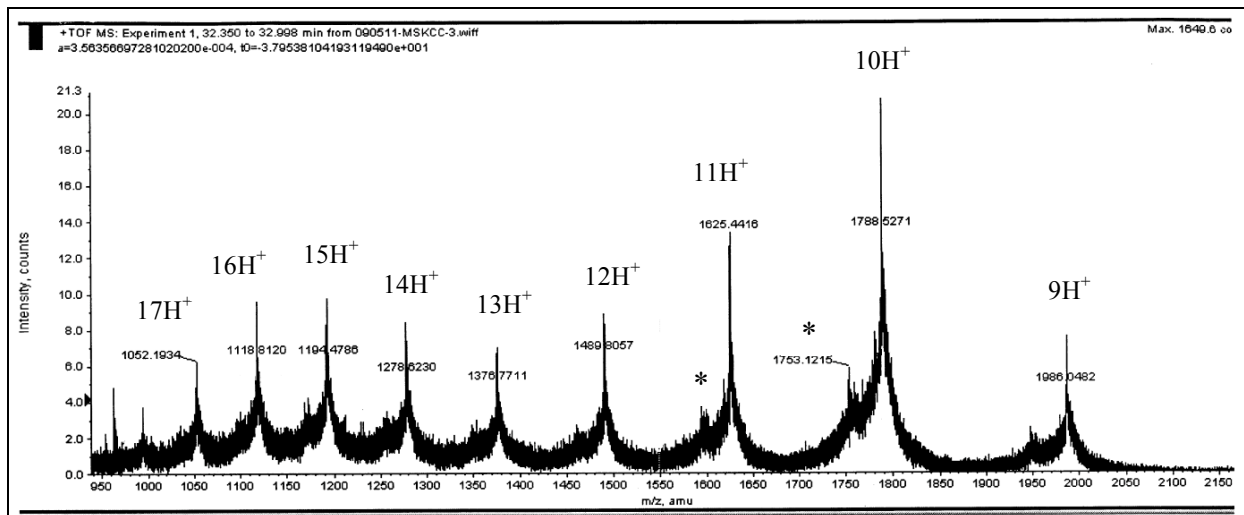

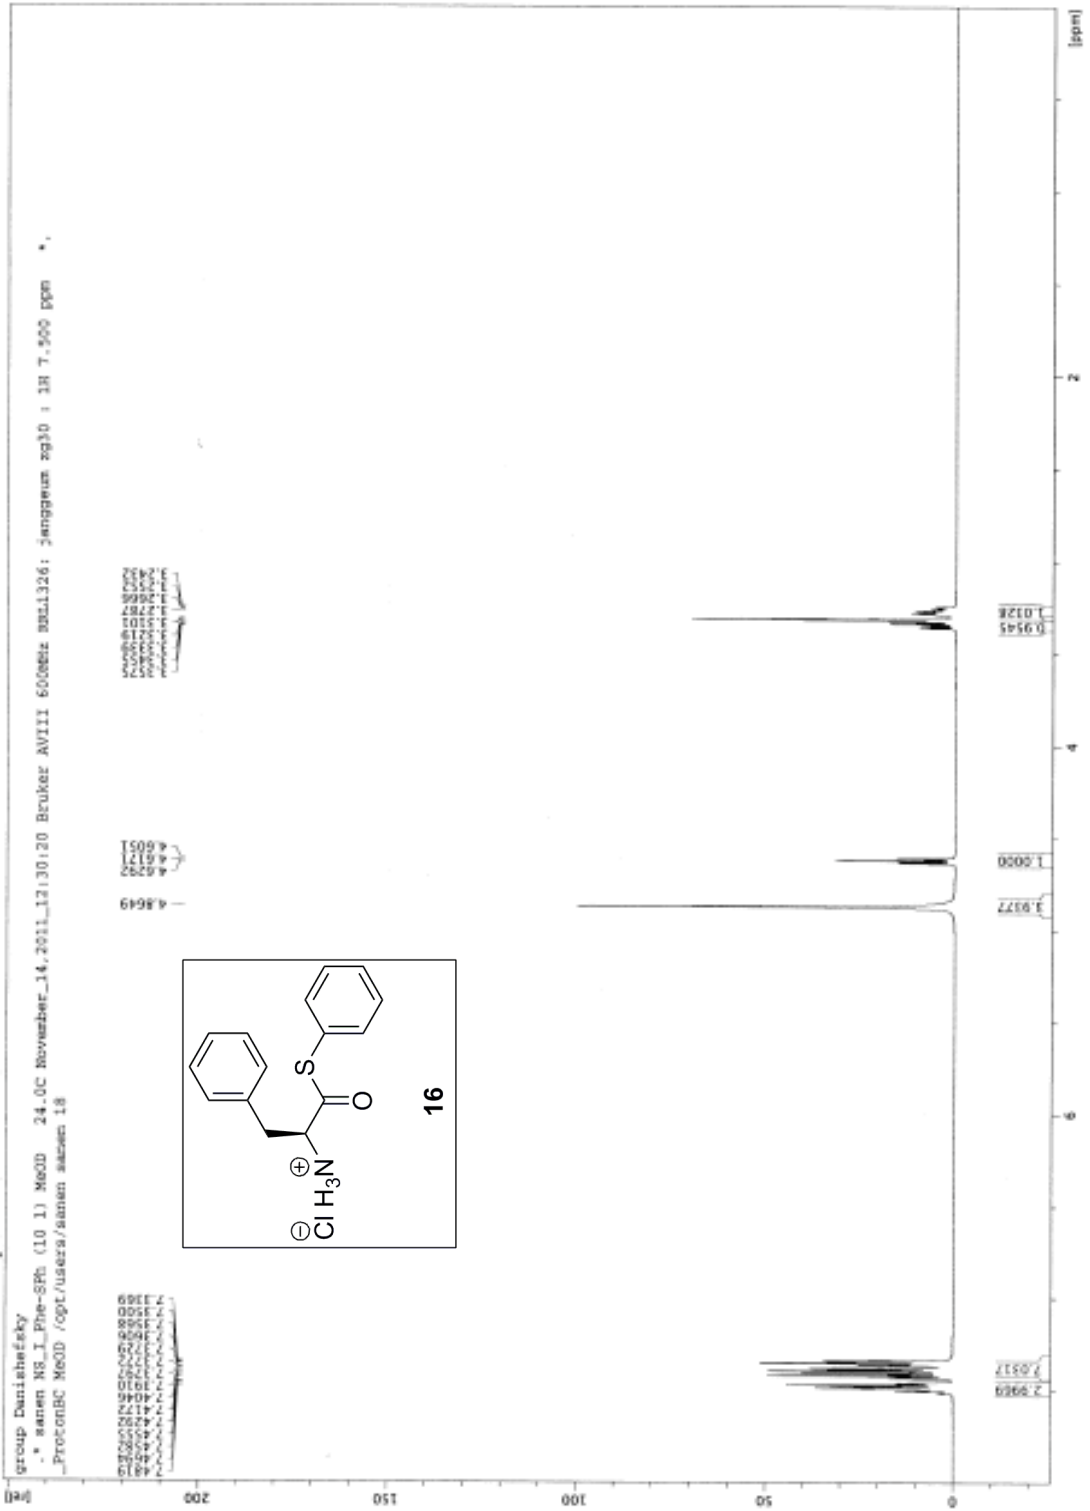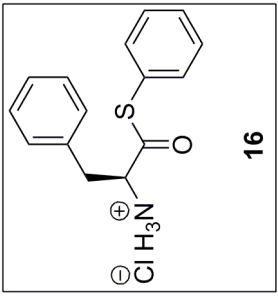

group Danishefky  
\* saven ME\_I\_The-SPh (11.1) MeCO 24.0C November\_14\_2011\_17:34:58 Bruker AVIII 600MHz RRL13261 \_sampeun apg30  
\*\_Carbonyl MeCO /opt/users/saven/saven 18  
F1  
F2  
F3  
F4  
F5  
F6  
F7  
F8  
F9  
F10  
F11  
F12  
F13  
F14  
F15  
F16  
F17  
F18  
F19  
F20  
F21  
F22  
F23  
F24  
F25  
F26  
F27  
F28  
F29  
F30  
F31  
F32  
F33  
F34  
F35  
F36  
F37  
F38  
F39  
F40  
F41  
F42  
F43  
F44  
F45  
F46  
F47  
F48  
F49  
F50  
F51  
F52  
F53  
F54  
F55  
F56  
F57  
F58  
F59  
F60  
F61  
F62  
F63  
F64  
F65  
F66  
F67  
F68  
F69  
F70  
F71  
F72  
F73  
F74  
F75  
F76  
F77  
F78  
F79  
F80  
F81  
F82  
F83  
F84  
F85  
F86  
F87  
F88  
F89  
F90  
F91  
F92  
F93  
F94  
F95  
F96  
F97  
F98  
F99  
F100  
F101  
F102  
F103  
F104  
F105  
F106  
F107  
F108  
F109  
F110  
F111  
F112  
F113  
F114  
F115  
F116  
F117  
F118  
F119  
F120  
F121  
F122  
F123  
F124  
F125  
F126  
F127  
F128  
F129  
F130  
F131  
F132  
F133  
F134  
F135  
F136  
F137  
F138  
F139  
F140  
F141  
F142  
F143  
F144  
F145  
F146  
F147  
F148  
F149  
F150  
F151  
F152  
F153  
F154  
F155  
F156  
F157  
F158  
F159  
F160  
F161  
F162  
F163  
F164  
F165  
F166  
F167  
F168  
F169  
F170  
F171  
F172  
F173  
F174  
F175  
F176  
F177  
F178  
F179  
F180  
F181  
F182  
F183  
F184  
F185  
F186  
F187  
F188  
F189  
F190  
F191  
F192  
F193  
F194  
F195  
F196  
F197  
F198  
F199  
F200  
F201  
F202  
F203  
F204  
F205  
F206  
F207  
F208  
F209  
F210  
F211  
F212  
F213  
F214  
F215  
F216  
F217  
F218  
F219  
F220  
F221  
F222  
F223  
F224  
F225  
F226  
F227  
F228  
F229  
F230  
F231  
F232  
F233  
F234  
F235  
F236  
F237  
F238  
F239  
F240  
F241  
F242  
F243  
F244  
F245  
F246  
F247  
F248  
F249  
F250  
F251  
F252  
F253  
F254  
F255  
F256  
F257  
F258  
F259  
F260  
F261  
F262  
F263  
F264  
F265  
F266  
F267  
F268  
F269  
F270  
F271  
F272  
F273  
F274  
F275  
F276  
F277  
F278  
F279  
F280  
F281  
F282  
F283  
F284  
F285  
F286  
F287  
F288  
F289  
F290  
F291  
F292  
F293  
F294  
F295  
F296  
F297  
F298  
F299  
F300  
F301  
F302  
F303  
F304  
F305  
F306  
F307  
F308  
F309  
F310  
F311  
F312  
F313  
F314  
F315  
F316  
F317  
F318  
F319  
F320  
F321  
F322  
F323  
F324  
F325  
F326  
F327  
F328  
F329  
F330  
F331  
F332  
F333  
F334  
F335  
F336  
F337  
F338  
F339  
F340  
F341  
F342  
F343  
F344  
F345  
F346  
F347  
F348  
F349  
F350  
F351  
F352  
F353  
F354  
F355  
F356  
F357  
F358  
F359  
F360  
F361  
F362  
F363  
F364  
F365  
F366  
F367  
F368  
F369  
F370  
F371  
F372  
F373  
F374  
F375  
F376  
F377  
F378  
F379  
F380  
F381  
F382  
F383  
F384  
F385  
F386  
F387  
F388  
F389  
F390  
F391  
F392  
F393  
F394  
F395  
F396  
F397  
F398  
F399  
F400  
F401  
F402  
F403  
F404  
F405  
F406  
F407  
F408  
F409  
F410  
F411  
F412  
F413  
F414  
F415  
F416  
F417  
F418  
F419  
F420  
F421  
F422  
F423  
F424  
F425  
F426  
F427  
F428  
F429  
F430  
F431  
F432  
F433  
F434  
F435  
F436  
F437  
F438  
F439  
F440  
F441  
F442  
F443  
F444  
F445  
F446  
F447  
F448  
F449  
F450  
F451  
F452  
F453  
F454  
F455  
F456  
F457  
F458  
F459  
F460  
F461  
F462  
F463  
F464  
F465  
F466  
F467  
F468  
F469  
F470  
F471  
F472  
F473  
F474  
F475  
F476  
F477  
F478  
F479  
F480  
F481  
F482  
F483  
F484  
F485  
F486  
F487  
F488  
F489  
F490  
F491  
F492  
F493  
F494  
F495  
F496  
F497  
F498  
F499  
F500  
F501  
F502  
F503  
F504  
F505  
F506  
F507  
F508  
F509  
F510  
F511  
F512  
F513  
F514  
F515  
F516  
F517  
F518  
F519  
F520  
F521  
F522  
F523  
F524  
F525  
F526  
F527  
F528  
F529  
F530  
F531  
F532  
F533  
F534  
F535  
F536  
F537  
F538  
F539  
F540  
F541  
F542  
F543  
F544  
F545  
F546  
F547  
F548  
F549  
F550  
F551  
F552  
F553  
F554  
F555  
F556  
F557  
F558  
F559  
F560  
F561  
F562  
F563  
F564  
F565  
F566  
F567  
F568  
F569  
F570  
F571  
F572  
F573  
F574  
F575  
F576  
F577  
F578  
F579  
F580  
F581  
F582  
F583  
F584  
F585  
F586  
F587  
F588  
F589  
F590  
F591  
F592  
F593  
F594  
F595  
F596  
F597  
F598  
F599  
F600  
F601  
F602  
F603  
F604  
F605  
F606  
F607  
F608  
F609  
F610  
F611  
F612  
F613  
F614  
F615  
F616  
F617  
F618  
F619  
F620  
F621  
F622  
F623  
F624  
F625  
F626  
F627  
F628  
F629  
F630  
F631  
F632  
F633  
F634  
F635  
F636  
F637  
F638  
F639  
F640  
F641  
F642  
F643  
F644  
F645  
F646  
F647  
F648  
F649  
F650  
F651  
F652  
F653  
F654  
F655  
F656  
F657  
F658  
F659  
F660  
F661  
F662  
F663  
F664  
F665  
F666  
F667  
F668  
F669  
F670  
F671  
F672  
F673  
F674  
F675  
F676  
F677  
F678  
F679  
F680  
F681  
F682  
F683  
F684  
F685  
F686  
F687  
F688  
F689  
F690  
F691  
F692  
F693  
F694  
F695  
F696  
F697  
F698  
F699  
F700  
F701  
F702  
F703  
F704  
F705  
F706  
F707  
F708  
F709  
F710  
F711  
F712  
F713  
F714  
F715  
F716  
F717  
F718  
F719  
F720  
F721  
F722  
F723  
F724  
F725  
F726  
F727  
F728  
F729  
F730  
F731  
F732  
F733  
F734  
F735  
F736  
F737  
F738  
F739  
F740  
F741  
F742  
F743  
F744  
F745  
F746  
F747  
F748  
F749  
F750  
F751  
F752  
F753  
F754  
F755  
F756  
F757  
F758  
F759  
F760  
F761  
F762  
F763  
F764  
F765  
F766  
F767  
F768  
F769  
F770  
F771  
F772  
F773  
F774  
F775  
F776  
F777  
F778  
F779  
F780  
F781  
F782  
F783  
F784  
F785  
F786  
F787  
F788  
F789  
F790  
F791  
F792  
F793  
F794  
F795  
F796  
F797  
F798  
F799  
F800  
F801  
F802  
F803  
F804  
F805  
F806  
F807  
F808  
F809  
F810  
F811  
F812  
F813  
F814  
F815  
F816  
F817  
F818  
F819  
F820  
F821  
F822  
F823  
F824  
F825  
F826  
F827  
F828  
F829  
F830  
F831  
F832  
F833  
F834  
F835  
F836  
F837  
F838  
F839  
F840  
F841  
F842  
F843  
F844  
F845  
F846  
F847  
F848  
F849  
F850  
F851  
F852  
F853  
F854  
F855  
F856  
F857  
F858  
F859  
F860  
F861  
F862  
F863  
F864  
F865  
F866  
F867  
F868  
F869  
F870  
F871  
F872  
F873  
F874  
F875  
F876  
F877  
F878  
F879  
F880  
F881  
F882  
F883  
F884  
F885  
F886  
F887  
F888  
F889  
F890  
F891  
F892  
F893  
F894  
F895  
F896  
F897  
F898  
F899  
F900  
F901  
F902  
F903  
F904  
F905  
F906  
F907  
F908  
F909  
F910  
F911  
F912  
F913  
F914  
F915  
F916  
F917  
F918  
F919  
F920  
F921  
F922  
F923  
F924  
F925  
F926  
F927  
F928  
F929  
F930  
F931  
F932  
F933  
F934  
F935  
F936  
F937  
F938  
F939  
F940  
F941  
F942  
F943  
F944  
F945  
F946  
F947  
F948  
F949  
F950  
F951  
F952  
F953  
F954  
F955  
F956  
F957  
F958  
F959  
F960  
F961  
F962  
F963  
F964  
F965  
F966  
F967  
F968  
F969  
F970  
F971  
F972  
F973  
F974  
F975  
F976  
F977  
F978  
F979  
F980  
F981  
F982  
F983  
F984  
F985  
F986  
F987  
F988  
F989  
F990  
F991  
F992  
F993  
F994  
F995  
F996  
F997  
F998  
F999  
F1000

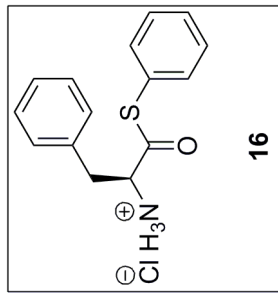

195.9887  
149.222  
148.222  
147.222  
146.222  
145.222  
144.222  
143.222  
142.222  
141.222  
140.222  
139.222  
138.222  
137.222  
136.222  
135.222  
134.222  
133.222  
132.222  
131.222  
130.222  
129.222  
128.222  
127.222  
126.222  
125.222  
124.222  
123.222  
122.222  
121.222  
120.222  
119.222  
118.222  
117.222  
116.222  
115.222  
114.222  
113.222  
112.222  
111.222  
110.222  
109.222  
108.222  
107.222  
106.222  
105.222  
104.222  
103.222  
102.222  
101.222  
100.222  
99.222  
98.222  
97.222  
96.222  
95.222  
94.222  
93.222  
92.222  
91.222  
90.222  
89.222  
88.222  
87.222  
86.222  
85.222  
84.222  
83.222  
82.222  
81.222  
80.222  
79.222  
78.222  
77.222  
76.222  
75.222  
74.222  
73.222  
72.222  
71.222  
70.222  
69.222  
68.222  
67.222  
66.222  
65.222  
64.222  
63.222  
62.222  
61.222  
60.222  
59.222  
58.222  
57.222  
56.222  
55.222  
54.222  
53.222  
52.222  
51.222  
50.222  
49.222  
48.222  
47.222  
46.222  
45.222  
44.222  
43.222  
42.222  
41.222  
40.222  
39.222  
38.222  
37.222  
36.222  
35.222  
34.222  
33.222  
32.222  
31.222  
30.222  
29.222  
28.222  
27.222  
26.222  
25.222  
24.222  
23.222  
22.222  
21.222  
20.222  
19.222  
18.222  
17.222  
16.222  
15.222  
14.222  
13.222  
12.222  
11.222  
10.222  
9.222  
8.222  
7.222  
6.222  
5.222  
4.222  
3.222  
2.222  
1.222  
0.222

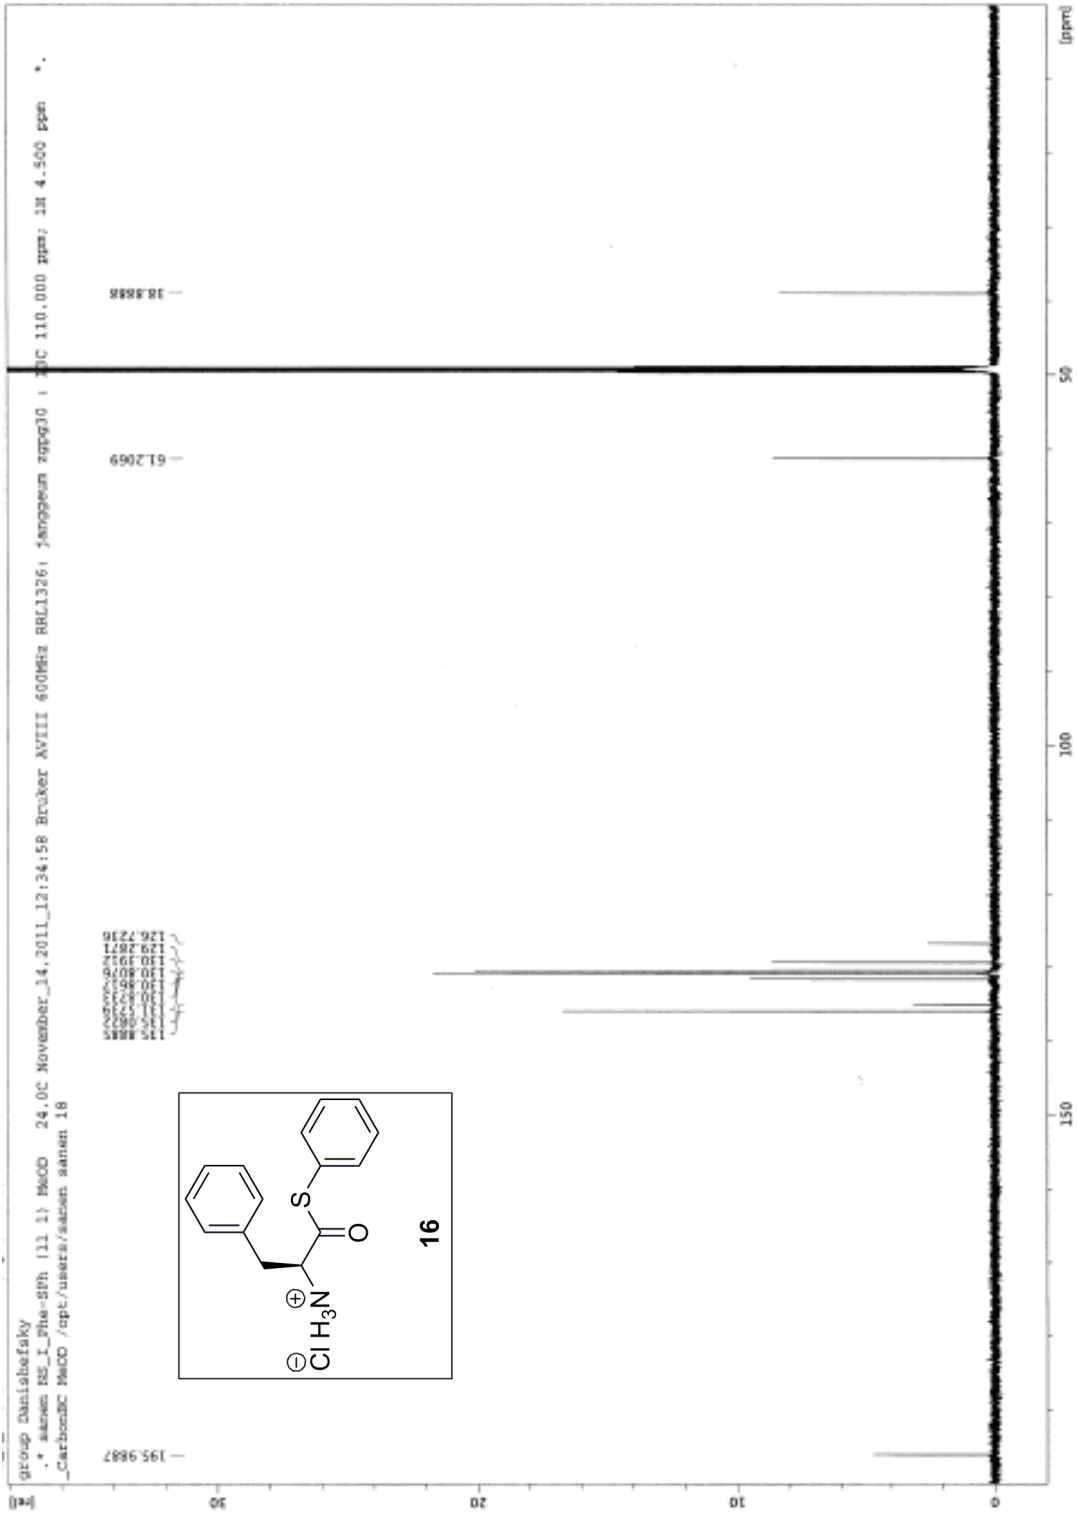



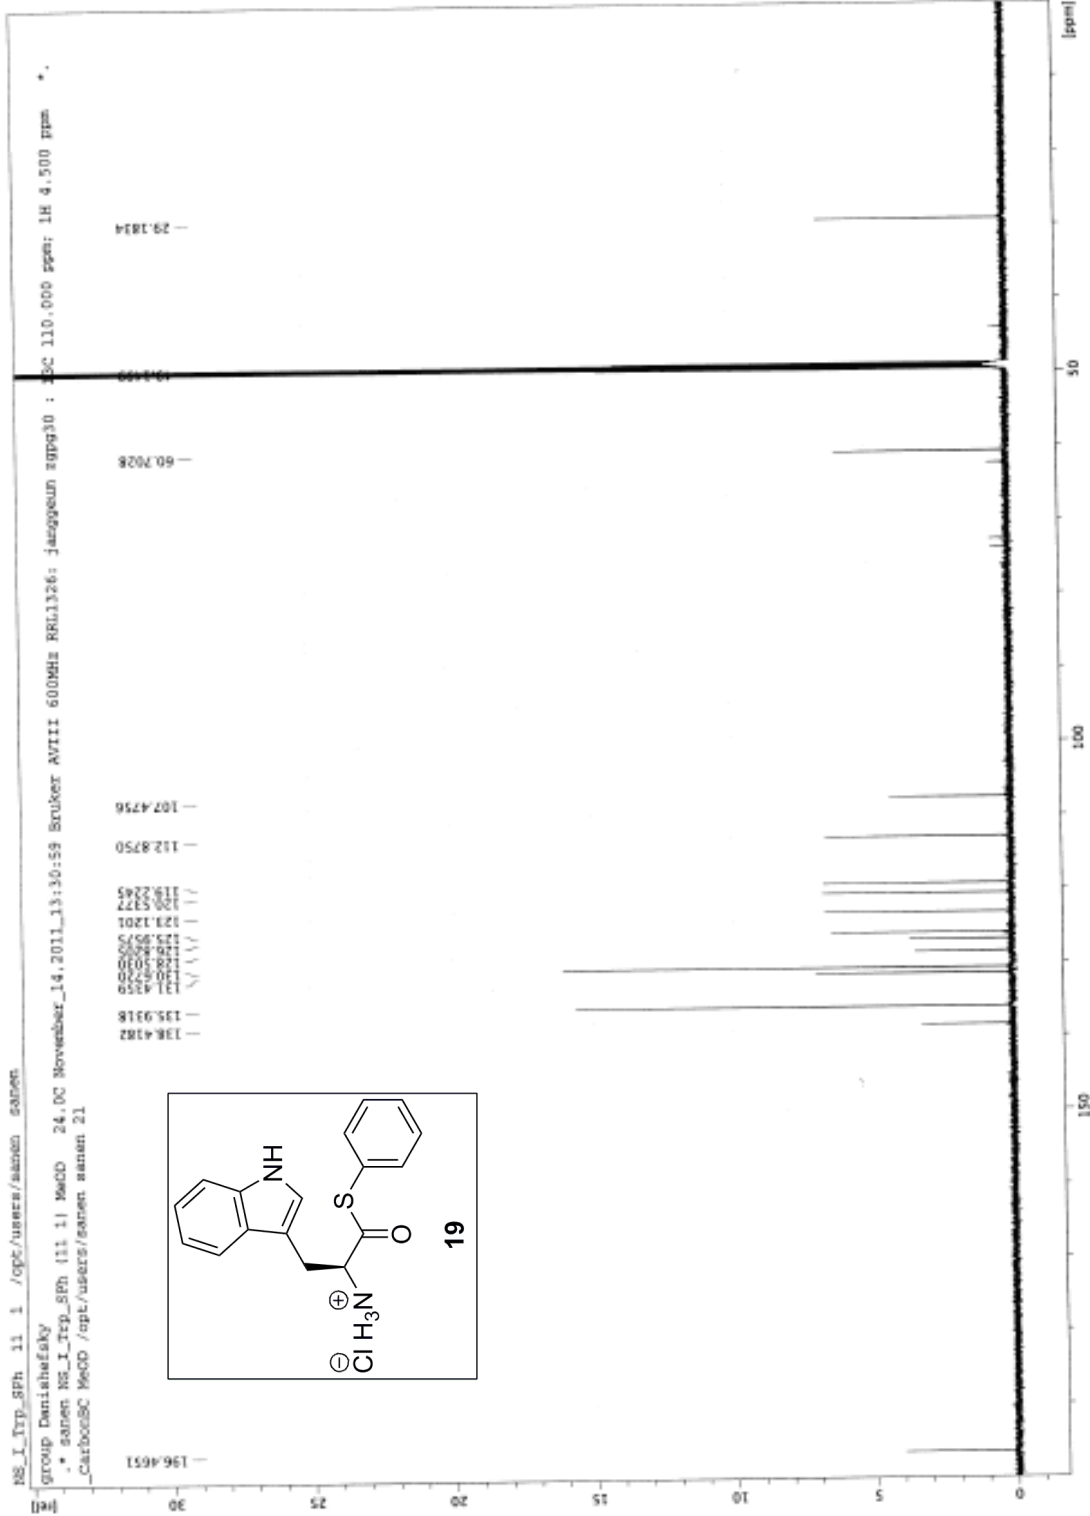

Supplement: NIHMS354299-supplement-Supporting_Information.pdf [file NIHMS354299-supplement-Supporting_Information.pdf]
